# Supplementary material for: Neural Stem Cells Rescue Cognitive and Motor Dysfunction in a Transgenic Model of Dementia with Lewy Bodies through a BDNF-Dependent Mechanism
Source: PubMed Central journal article supplement — Stem Cell Reports. 2015 Oct 17;5(5):791–804. doi: 10.1016/j.stemcr.2015.09.008 (PMC4649255; doi:10.1016/j.stemcr.2015.09.008), 2015-10-17
Supplement: mmc2.pdf [file mmc2.pdf]

# Neural Stem Cells Rescue Cognitive and Motor Dysfunction in a Transgenic Model of Dementia with Lewy Bodies through a BDNF-Dependent Mechanism

Natalie R.S. Goldberg,<sup>1,2,3</sup> Jacqueline Caesar,<sup>2,3</sup> Ashley Park,<sup>2</sup> Shawn Sedgh,<sup>2</sup> Gilana Finogenov,<sup>2</sup> Eliezer Masliah,<sup>4</sup> Joy Davis,<sup>2,3</sup> and Mathew Blurton-Jones<sup>1,2,3,\*</sup>

<sup>1</sup>Department of Neurobiology and Behavior, University of California, Irvine, Irvine, CA 92697, USA

<sup>2</sup>Sue & Bill Gross Stem Cell Research Center, University of California, Irvine, Irvine, CA 92697, USA

<sup>3</sup>Institute for Memory Impairments and Neurological Disorders, University of California, Irvine, Irvine, CA 92697, USA

<sup>4</sup>Department of Pathology and Medicine, University of California, San Diego, San Diego, CA 92093, USA

\*Correspondence: [mblurton@uci.edu](mailto:mblurton@uci.edu)

<http://dx.doi.org/10.1016/j.stemcr.2015.09.008>

This is an open access article under the CC BY-NC-ND license (<http://creativecommons.org/licenses/by-nc-nd/4.0/>).

## SUMMARY

Accumulation of  $\alpha$ -synuclein ( $\alpha$ -syn) into insoluble aggregates occurs in several related disorders collectively referred to as synucleinopathies. To date, studies have used neural stem cells (NSCs) to examine questions about  $\alpha$ -syn propagation, but have overlooked the therapeutic potential of NSC transplantation to modulate cognition in disorders such as dementia with Lewy bodies or Parkinson's disease dementia. Here, we show that striatal transplantation of NSCs into aged  $\alpha$ -syn transgenic mice significantly improves performance in multiple cognitive and motor domains. This recovery is associated with NSC expression of brain-derived neurotrophic factor (BDNF), which restores depleted levels and modulates dopaminergic and glutamatergic systems. Most importantly, transplantation of BDNF-depleted NSCs fails to improve behavior, whereas AAV-mediated BDNF delivery mimics the benefits of NSC transplantation, supporting a critical role for this neurotrophin in functional improvement. Thus, NSC transplantation could offer a promising approach to treat the understudied yet devastating cognitive components of many synucleinopathies.

## INTRODUCTION

Dementia with Lewy bodies (DLB) is the second most common cause of age-related dementia, affecting over 1.3 million people in the United States alone (Vann Jones and O'Brien, 2014). DLB is associated with the accumulation of insoluble aggregates of the presynaptic protein  $\alpha$ -syn within the cortex, hippocampus, and brainstem that leads to progressive neurodegeneration and impairments in cognition and spontaneous mild parkinsonism (Mayo and Bordelon, 2014). DLB is closely related to a second disorder, Parkinson's disease (PD) dementia (PDD) that develops in up to 70% of PD patients (Dubois and Pillon, 1997; Marsh and Blurton-Jones, 2012). Current treatments for DLB and PDD are limited and provide only modest symptomatic relief; thus, there is a pressing need to identify new and effective therapies.

Unfortunately, the impact of stem cell transplantation in models that develop  $\alpha$ -syn pathology has thus far only been examined in terms of cell-to-cell transmission of pathology (Desplats et al., 2009; Hansen et al., 2011). In contrast, many studies have demonstrated promising improvements in motor function by transplanting dopaminergic (DAergic) precursors in neurotoxin models of PD (Lees and Smith, 1983; Docherty and Burn, 2010). However, cognitive deficits in DLB/PDD are strongly associated with  $\alpha$ -syn and neurotoxin models fail to mimic this important phenotype. It therefore remains critical to examine the

therapeutic potential of stem cell transplantation in the presence of  $\alpha$ -syn pathology and to better understand the impact of cell transplantation in models of DLB and PDD.

In this context, neural stem cells (NSCs), which can migrate and produce high levels of neurotrophic factors, may offer a promising alternative to DA precursor transplantation. Here, we utilized a human  $\alpha$ -syn-expressing mouse model that recapitulates many of the salient features of DLB/PDD, including the progressive development of Lewy body pathology and significant cognitive dysfunction (Masliah et al., 2000; Amschl et al., 2013). Using these mice, we investigated the migration and differentiation of transplanted NSCs within the striatum and their impact on behavior,  $\alpha$ -syn pathology, and DAergic and glutamatergic regulation. Our results reveal that NSC transplantation can dramatically improve both motor and cognitive function by elevating levels of brain-derived neurotrophic factor (BDNF), a protein implicated in DLB/PDD cognitive impairments (Leverenz et al., 2011). Pharmacological manipulations implicate both DAergic and glutamatergic circuits downstream of BDNF in this recovery. Furthermore, shRNA-mediated loss-of-function studies confirm the necessity of BDNF in this process, and AAV-mediated gain-of-function experiments demonstrate that BDNF can mimic the benefits of NSC transplantation. Collectively, our studies reveal that NSCs can improve both the motor and cognitive symptoms of DLB/PDD in a progressive

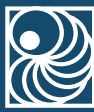

transgenic model by elevating levels of BDNF and enhancing DAergic and glutamatergic function.

## RESULTS

### NSC Transplantation Rescues Both Motor and Cognitive Deficits in $\alpha$ -Synuclein Transgenic Mice

In order to assess the impact of NSC transplantation on h- $\alpha$ -syn-associated cognitive and motor dysfunction, we stereotactically injected haplotype-matched murine NSCs or vehicle bilaterally into 12-month-old h- $\alpha$ -syn overexpressing (ASO) mice or WT littermates (100,000 cells per side). At this age, ASO mice exhibit widespread Lewy body-like pathology as well as substantial motor and cognitive impairments (Masliah et al., 2000; Amschl et al., 2013). In order to achieve the greatest impact of transplantation on both cognitive and motor systems that are altered by  $\alpha$ -syn accumulation, we targeted the dorsal striatum (Figure 1A; see Supplemental Experimental Procedures), widely known to be involved in learning and memory and highly interconnected with multiple cortical regions. We used previously characterized GFP-expressing NSCs (Mizumoto et al., 2003; Blurton-Jones et al., 2009). At 1 month after transplantation, mice were habituated, trained, and tested on three motor tasks and two cognitive tasks, and engraftment was assessed.

As expected, vehicle-treated ASO (ASOV) mice showed significant impairments in all three motor tasks compared with vehicle-injected WTs (WTV). The ASOV mice took twice as long to reorient before descending on the pole task (Figure 1B;  $F_{(3, 18)} = 3.9$ ; ANOVA  $p = 0.03$ ). Likewise, ASOV mice fell of the Rotarod in half the time of WTV controls (Figure 1C;  $F_{(3, 18)} = 9.5$ ; ANOVA  $p = 0.0006$ ) and exhibited an 83% increase in foot faults in the beam traversal task (Figure 1D;  $F_{(3, 18)} = 12$ , ANOVA  $p = 0.0002$ ). In contrast, ASO mice that received NSC transplants (ASOC) performed similarly to both WTV and NSC-injected WT mice (WTC) in all three motor tasks, demonstrating that NSC transplantation can dramatically improve motor function in transgenic  $\alpha$ -synuclein mice.

To examine cognition in a model with motor impairments, it is critical to use tasks that are not heavily influenced by motor function. We therefore utilized Novel Object Recognition (NOR) and Novel Place Recognition (NPR) tasks: low-stress paradigms that quantify the proportion of time spent examining a novel object and provide data on cortical-dependent and hippocampal-dependent memory, respectively. All four groups were habituated, trained, and tested following standard protocols (Supplemental Experimental Procedures). Twenty-four hours after training, mice were exposed to a novel object or novel object placement, and the discrimination ratio between

exploration time of old and new objects was calculated. As shown, ASOV mice exhibited significant impairments in NOR compared with WTV and WTC groups, demonstrating that h- $\alpha$ -syn overexpression can model important aspects of DLB/PDD-related cognitive impairment (Figure 1E;  $F_{(3, 18)} = 19.3$ ; ANOVA  $p = 0.0001$ ). Striatal transplantation of NSCs dramatically improved performance in this cortical-dependent task, as ASOC mice discriminated between novel and familiar objects to a greater degree than either WTV or WTC mice, indicating not only a benefit, but enhancement in this task. In the hippocampal-dependent NPR task, ASOV mice again showed significant impairments that were also rescued by NSC transplantation (Figure 1F;  $F_{(3, 18)} = 21$ ; ANOVA  $p = 0.0001$ ). Because we found no differences in activity during training (data not shown), this confirmed that h- $\alpha$ -syn expression and NSC transplantation alter memory performance independent of effects on motor function. Thus, we demonstrate that NSC transplantation can rescue both motor and cognitive deficits in a transgenic model of DLB/PDD.

### NSCs Migrate throughout the Striatum and into the Cortex but Do Not Reach the Hippocampus

To begin to decipher the mechanism by which GFP-NSC transplantation ameliorates behavioral deficits, we examined the migration and differentiation of engrafted cells. Confocal microscopy demonstrated that at 6 weeks following transplantation GFP-NSCs had migrated throughout the striatum (Figure 1G). A modest number of cells were also observed within the motor and perirhinal cortices and amygdala, and in a few animals, some cells even reached the substantia nigra (data not shown). However, no GFP-NSCs were detected within the hippocampus of any animals. Engrafted NSCs differentiated primarily into astrocytes and immature oligodendrocytes, with only a few cells exhibiting an early neuronal fate (Figures 1H, 1I, and S1). No examples of fully matured GFP/NeuN double-labeled neurons were detected (Figure S1). Taken together, these findings are consistent with previous reports that murine NSCs predominantly acquire gliogenic phenotypes when transplanted into non-neurogenic regions and with other studies that utilized these postnatal day 1-derived cells (Herrera et al., 1999; Yamasaki et al., 2007; Blurton-Jones et al., 2009). Interestingly, no significant differences in NSC differentiation were detected between ASO and WT transplanted mice (Figure 1I), and each cell type migrated with similar distribution and distance from the injection site (Figure S1A). Finally, we examined markers of undifferentiated and proliferating cell types, finding that a small number of NSCs that had migrated beyond the dorsal striatum still expressed the mitotic marker Ki67, or immature NSC markers Nestin or Vimentin (Figures S2A–S2C).

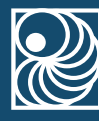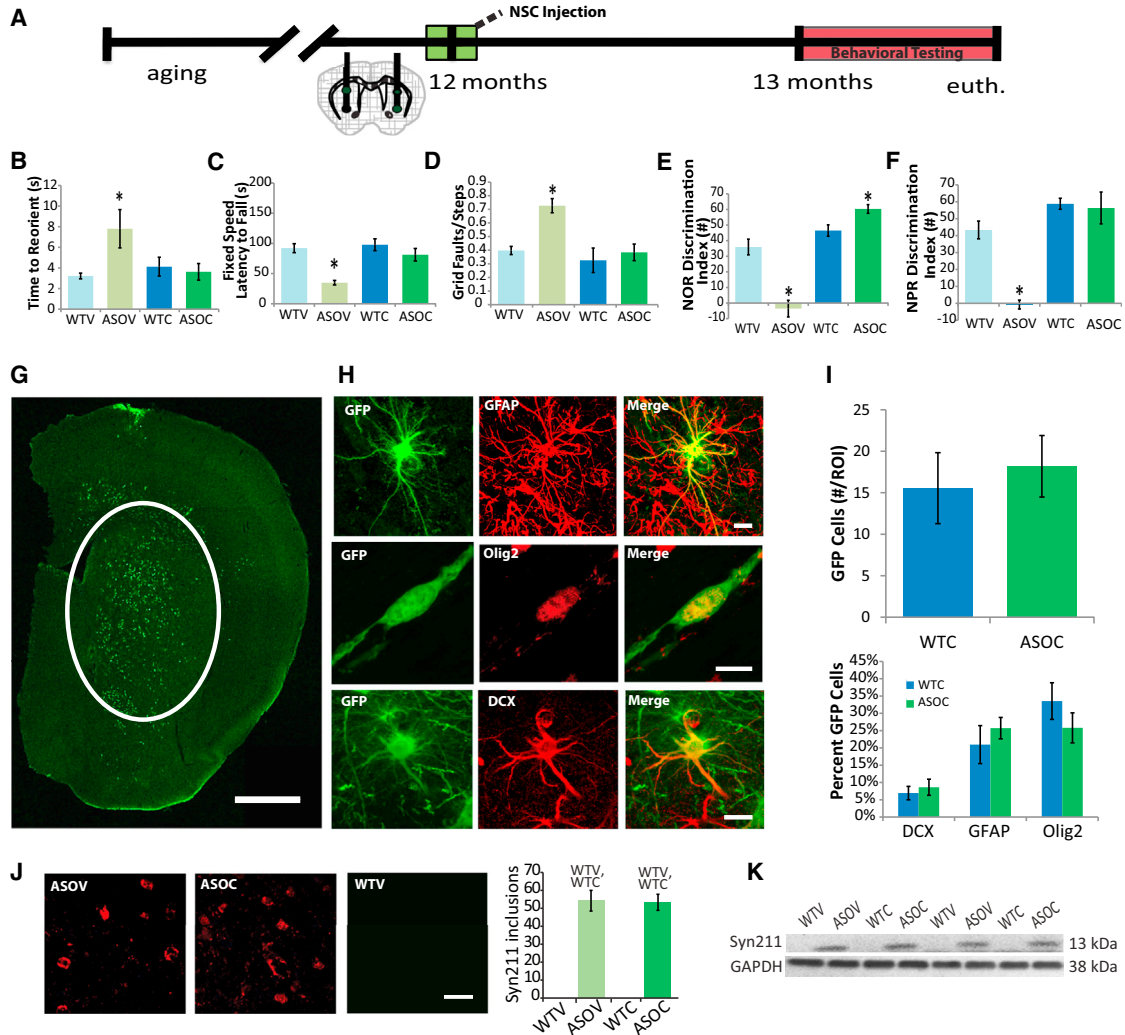

### Figure 1. NSC Transplantation Improves Both Motor and Cognitive Function in $\alpha$ -Synuclein Transgenic Mice

(A)  $\alpha$ -Synuclein-overexpressing (ASO) and WT mice were aged to 12 months, and then syngeneic GFP-NSCs were transplanted bilaterally into the striatum; 1 month later, motor and cognitive behavior were assessed.

(B–D) ASO vehicle treated controls (ASOV) show deficits in Pole reorientation (B), Rotarod performance (C), and beam traversal (D) tasks, which were significantly ameliorated by NSC transplantation (ASOC).

(E and F) ASOV mice also showed significant deficits in cortical-dependent NOR (E) and hippocampal-dependent NPR (F), which were improved by NSC transplantation (ASOC).

(G) GFP-NSCs (green) migrated from their medial striatal injection sites and engrafted predominantly within the striatum.

(H) The majority of NSCs differentiated into astrocytes (GFAP, red) and immature oligodendrocytes (Olig2, red). A smaller proportion of NSCs adopted an early neuronal phenotype (DCX, red).

(I) No differences in NSC engraftment or differentiation were detected between WTC and ASOC groups.

(J) Immunohistochemical analysis also revealed no differences in either striatal h- $\alpha$ -syn inclusion number between ASOV and ASOC mice, and no differences were detected in WT mice; Fisher's PLSD post hoc  $^{WTV,WTC} p < 0.003$ .

(K) Western blot analysis of striatal monomeric h- $\alpha$ -syn (Syn211) was not significantly altered by NSCs. Data are presented as mean  $\pm$  SEM; ANOVA  $p < 0.05$  and Fisher's PLSD post hoc  $*p < 0.0001$  compared with all other groups ( $n = 6$ –8 mice/group).

Scale bar represents 100  $\mu$ m (B) and 10  $\mu$ m (C and D). See also [Figures S1](#) and [S2](#).

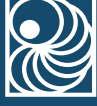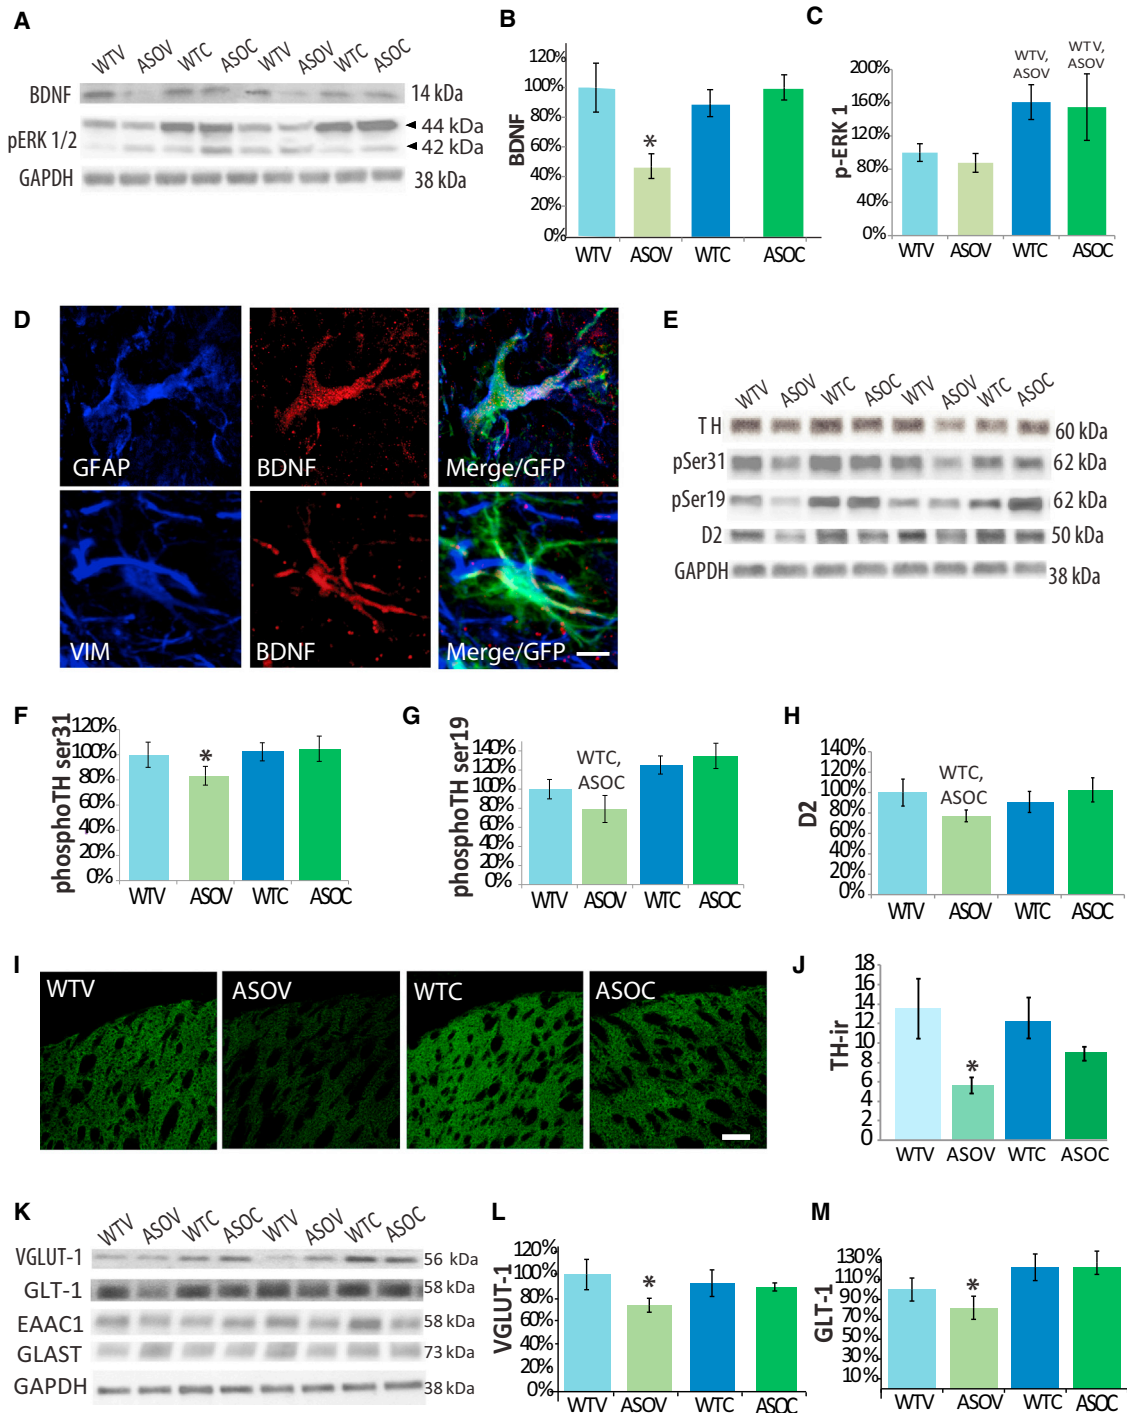

**Figure 2. NSC Transplantation Enhances Striatal BDNF Signaling with Downstream Effects on Dopamine and Glutamate Systems** (A and B) Western blots revealed that striatal BDNF was significantly decreased in ASOV mice but restored to WT levels by NSC transplantation.

(C) Downstream of BDNF, phosphorylated Erk1 was significantly elevated by transplantation (A and C).

(D) Transplanted cells continue to express BDNF, primarily within GFAP or Vimentin co-labeled astrocytic cells.

(E-G) Activated forms of TH (p-ser31 and p-ser19) were significantly decreased in ASOV mice and elevated by transplantation.

(H) The DA receptor type D2 was also decreased in ASOV mice and elevated in ASOC mice (E and H).

(legend continued on next page)



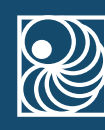

### Human $\alpha$ -Synuclein Pathology Is Not Altered by NSC Transplantation

Previous studies have shown that reduction of  $\alpha$ -syn can improve motor function in  $\alpha$ -syn transgenic mice (Masliah et al., 2011). We therefore examined the effects of striatal NSC transplantation on  $\alpha$ -syn pathology in multiple brain regions. Using a human-specific antibody, we first confirmed that h- $\alpha$ -syn protein was expressed exclusively in ASO mice. Interestingly, we found no effect of NSC transplantation on h- $\alpha$ -syn, as both ASOV and ASOC groups exhibited equivalent numbers of Lewy-body-like inclusions within the dorsal striatum (Figure 1J). Further quantification of both detergent-soluble and insoluble h- $\alpha$ -syn by western blot in the striatum (Figure 1K), hippocampus, perirhinal, motor and prefrontal cortices, and the substantia nigra also confirmed that NSCs had no effect on monomeric h- $\alpha$ -syn (Figures S3A–S3F). Likewise, monomeric  $\alpha$ -syn phosphorylated at serine 129 (pS129), a pathological associated epitope, was also equivalent between NSC and vehicle-injected ASO mice (post hoc Fisher's PLSD,  $p = 0.14$ ; data not shown).

### NSC-Induced Cognitive and Motor Improvements Are Accompanied by Increased BDNF

Having found that NSCs had no impact on  $\alpha$ -synuclein pathology, we began to explore other potential mechanisms that could be involved in NSC-mediated motor and cognitive improvements. We previously showed that these GFP-NSCs can produce high levels of specific growth factors including BDNF (Blurton-Jones et al., 2009). Western blot analysis revealed that striatal BDNF expression in ASOV mice was half of that in WTV controls, but was fully restored to WT levels in ASOC mice by NSC transplantation (Figures 2A and 2B;  $F_{(3, 18)} = 3.8$ ; ANOVA  $p = 0.03$ ). NSCs did not increase BDNF in WTC mice, likely due to neurotrophic self-regulatory mechanisms (Canossa et al., 1997; Bambah-Mukku et al., 2014). Importantly, the BDNF receptor TrkB was unaltered by either genotype or treatment (Figures S3G and S3H), suggesting that increased BDNF could readily influence behavior via the existing TrkB receptor population. In contrast, no difference in expression of glial-derived neurotrophic factor (GDNF; Figures S3G–S3J) or its phosphorylated receptor RET were observed between any treatment groups, indicating that changes in BDNF

specifically play an important role in  $\alpha$ -syn transgenic mice. In addition to the detected changes in BDNF, phosphorylation of Erk1 (44 kDa), a major downstream effector of BDNF signaling, was also increased by NSC transplantation in both ASOC and WTC mice (Figures 2A and 2C;  $F_{(3, 18)} = 4.2$ ; ANOVA  $p = 0.02$ ). We confirmed that transplanted NSCs continue to express BDNF primarily in cells co-expressing GFAP or vimentin (Figure 2D), suggesting that glial-fated NSCs may contribute substantially to increasing BDNF levels. Thus, NSC-mediated changes in BDNF appear to influence growth and plasticity-associated signal transduction within the striatum.

### NSC Transplantation Alters Dopaminergic and Glutamatergic Systems

To further understand the mechanism by which NSC-derived BDNF ameliorates motor and cognitive behaviors, we examined changes in expression of the rate-limiting enzyme in DA synthesis, tyrosine hydroxylase (TH), as well as markers of glutamate transport and regulation. First, we utilized a well-established optical signal intensity analysis to examine TH terminals within the striatum (Fernagut et al., 2007). As expected, we detected a significant reduction in TH-immunoreactive (TH-ir) terminals within the dorsal striatum of ASOV mice relative to WTV controls (Figures 2I, 2J, and S3K). More importantly, there was a significant partial restoration of TH density in ASO mice that received NSCs. In contrast, we confirmed as previously reported that TH-ir neurons in the substantia nigra pars compacta (SNpc) were not altered by h- $\alpha$ -syn in this model or by NSC transplantation (Rockenstein et al., 2002) (Figure S3L). To follow up on these findings, we performed biochemical analysis of TH as well as two phospho-epitopes of TH (serine-19 and serine-31) that are associated with increased activity and dopamine production. Consistent with our immunohistochemical data, TH phosphorylated at either site was significantly increased in ASOC mice, suggesting that NSCs elevate TH activity (Figures 2E–2G;  $F_{(3, 18)} = 5.2$ ; ANOVA  $p = 0.01$ ). In further support of this effect, expression of the DA receptor D2 was also significantly increased with NSCs (Figures 2E and 2H;  $F_{(3, 18)} = 6.4$ ; ANOVA  $p = 0.03$ ). These data strongly suggest that NSC transplantation enhances the function and signaling of existing nigrostriatal DAergic neurons.

(I and J) Confocal optical densitometry confirmed significantly reduced expression of TH in ASOV striatum that was restored toward WT levels in ASOC mice.

(K and L) Striatal VGLUT-1 was also significantly decreased in ASOV mice and restored to WT levels by NSCs.

(M) NSC transplantation also elevated striatal levels of GLT-1, but not EAAC1 and GLAST (K and M). Data are presented as mean  $\pm$  SEM. All western blot graphs are presented as a percentage of WTV group. Fisher's PLSD post hoc \* $p < 0.03$  compared with all other groups, <sup>WTV</sup> $p < 0.01$ , <sup>ASOV</sup> $p < 0.01$ , <sup>WTC, ASOC</sup> $p < 0.004$  ( $n = 6$ – $8$  mice per group).

Scale bar represents 10  $\mu$ m (D) and 30  $\mu$ m (I).

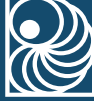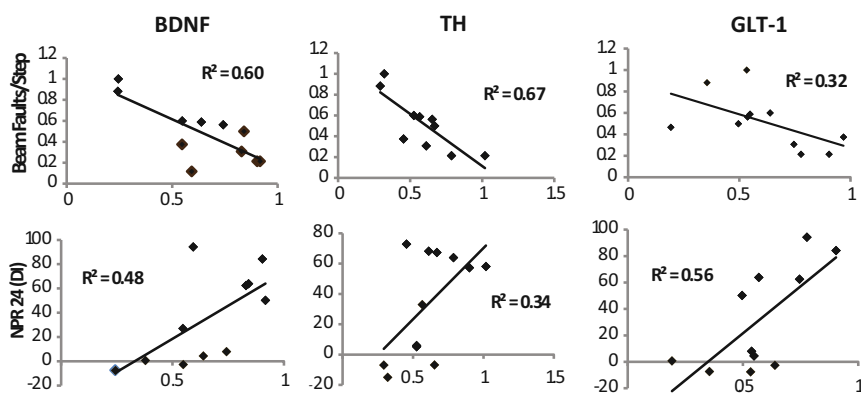

**Figure 3. BDNF Expression Correlates with Both Motor and Cognitive Function, whereas TH and GLT-1 Show Distinct Associations with Motor and Cognitive Function**

BDNF, TH, and GLT-1 were compared with cognitive (NPR) and motor (beam faults/step) performance in ASO and ASOC mice. BDNF was highly correlated with improvements in both behaviors. However, while TH was more closely correlated with motor behavior, GLT-1 was more significantly associated with cognitive function, suggesting that dopaminergic and glutamatergic systems play key roles in motor and cognitive recovery respectively.

Data points represent within-subject means of individual animals  $p < 0.05$ . X axis, protein levels are represented as the percentage of WTV; y axis, beam faults/step are numerical ratios. NPR DI values are discrimination index ratios (see [Supplemental Experimental Procedures](#);  $n = 7$  mice per group). See also [Figure S3](#).

We next examined the expression of glutamate transporters within the striatum to determine whether  $\alpha$ -syn expression or NSC transplantation might influence corticostriatal and hippocampal-striatal glutamatergic projections. BDNF is known to impact glutamate signaling and activity to enhance plasticity ([Gottmann et al., 2009](#)), and previous studies have strongly implicated glutamatergic dysfunction in PD ([Greenamyre, 1993](#); [Albin et al., 1995](#)); nevertheless, the potential therapeutic relevance of glutamatergic systems to synucleinopathies and especially DLB/PDD-associated cognitive dysfunction has been largely unexplored. Corticostriatal glutamatergic projections can be readily identified and examined via expression of vesicular glutamate transporter 1 (VGLUT-1). When levels of VGLUT-1 within the dorsal striatum were quantified, we found a significant 35% decrease in ASOV mice versus WTV controls. More importantly, this reduction was restored to normal levels by NSC transplantation (Figures 2K and 2L;  $F_{(3,18)} = 3.3$ ; ANOVA  $p = 0.04$ ). In contrast, thalamostriatal specific VGLUT-2 expression was unchanged, suggesting NSCs have specific effect on corticostriatal glutamatergic systems (post hoc Fishers's PLSD  $p = 0.1$ , data not shown).

Another glutamate transporter implicated in PD is the glial-specific transporter GLT-1 ([Massie et al., 2010](#); [Salvatore et al., 2012](#)), which plays an important role in multiple aspects of neuronal plasticity and can be upregulated by BDNF ([Rodriguez-Kern et al., 2003](#); [Pita-Almenar et al., 2012](#)). Although GLT-1 levels were unaltered between WTV and ASOV groups, we found that NSC transplantation significantly increased GLT-1 expression in both ASOC and WTC groups (Figures 2K and 2M;  $F_{(3,18)} = 7.6$ ; ANOVA  $p = 0.002$ ). By comparison, no changes were detected in the two other glutamate transporters expressed by both neurons and glia, EAAC1 or GLAST ([Figure 2K](#)). Together these data show that corticostriatal glutamatergic

systems are indeed altered in  $\alpha$ -syn transgenic mice and that NSC transplantation can modulate astrocyte-dependent corticostriatal glutamatergic systems.

#### Changes in BDNF, TH, and GLT-1 Correlate with Distinct Improvements in Motor and Cognitive Tasks

The dramatic reduction in BDNF induced by h- $\alpha$ -syn expression and the corresponding elevation of BDNF following NSC transplantation suggest that this neurotrophin plays an important role in NSC-mediated behavioral improvements. Supporting this hypothesis, striatal BDNF expression in individual mice correlates well with NPR performance ( $R^2 = 0.48$ ;  $p = 0.005$ ) and inversely to beam traversal faults ([Figure 3](#);  $R^2 = 0.60$ ;  $p = 0.0001$ ). Potentially downstream of BDNF, TH expression is also correlated strongly with beam traversal performance, but less so with hippocampal-dependent NPR. Conversely, GLT-1 was significantly associated with NPR but showed a less consistent association with beam traversal performance ([Figure 3](#)). To further examine the potential divergent role of these systems in motor and cognitive recovery we employed pharmacological loss-of-function approaches using the DA synthesis inhibitor  $\alpha$ -methyl-p-tyrosine ( $\alpha$ MT) and GLT-1 inhibitor dihydrokainic acid (DHK). Safe and optimal doses were determined by dose response studies ([Figure S4](#)). A new set of ASO mice were then transplanted with NSCs with or without co-treatment with  $\alpha$ MT (ASOC- $\alpha$ MT) or DHK (ASOC-DHK) ([Figure 4A](#)). At 1 month after transplantation, behavioral testing was again performed. In Rotarod and beam traversal motor tasks,  $\alpha$ MT prevented NSC-induced recovery; however, ASOC-DHK mice still exhibited improved performance ([Figures 4B and 4C](#);  $F_{(3,20)} = 9.6$ ; ANOVA  $p = 0.0004$ ;  $F_{(3,20)} = 3.9$ ; ANOVA  $p = 0.03$ ). These data further support the notion that while TH phosphorylation is clearly necessary for NSC-mediated motor improvements, changes in striatal glutamate reuptake via

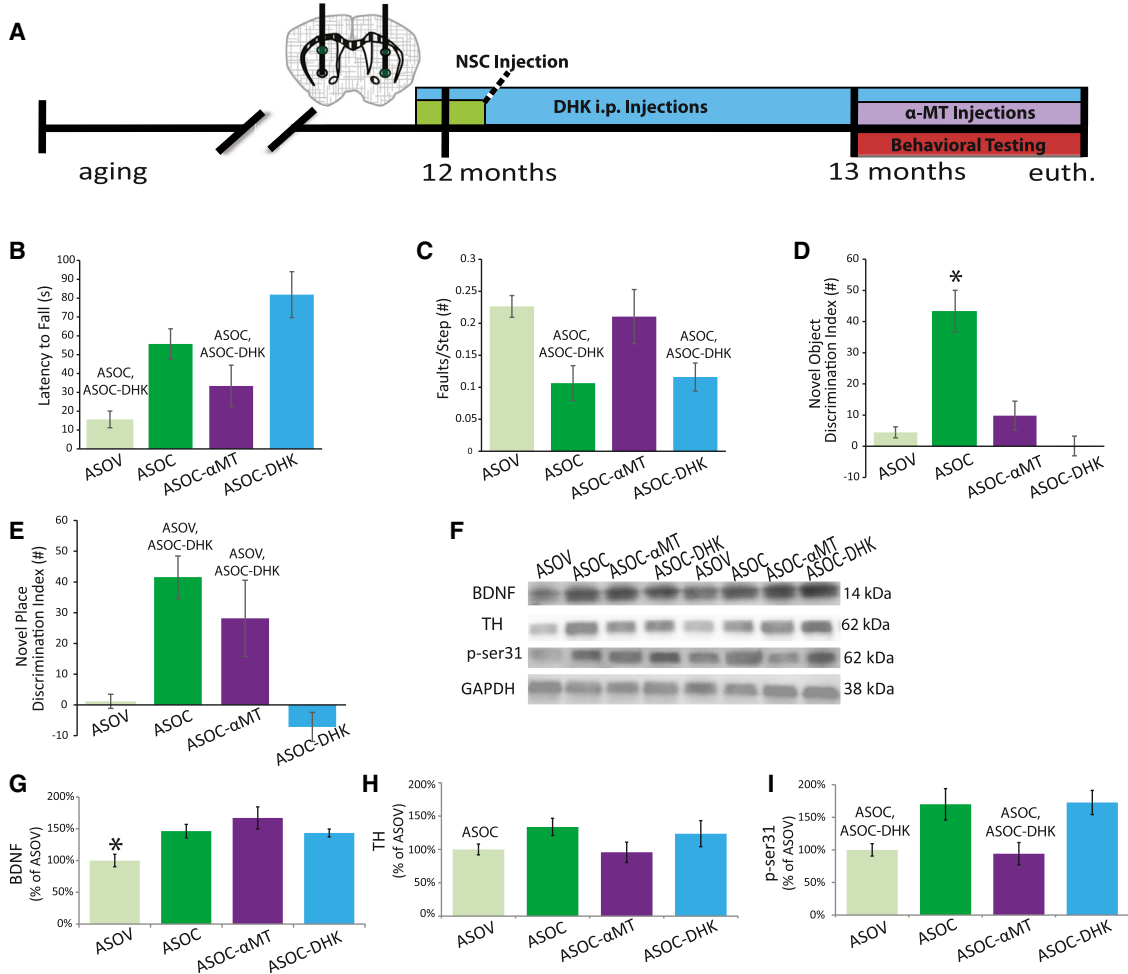

#### Figure 4. TH and GLT-1 Function Are Necessary for NSC-Mediated Behavioral Improvements

(A) One group of ASOC mice received intraperitoneal DHK injections daily following a post-NSC-transplantation recovery period of 2 days and continuing through behavioral testing. Another group of ASOC mice received the TH inhibitor  $\alpha$ -methyl-p-tyrosine (ASOC- $\alpha$ MT) over the ten days prior to and during behavioral assessment.

(B and C)  $\alpha$ MT prevented NSC-mediated Rotarod (B) and beam traversal (C) recovery in ASOC mice; however, ASOC-DHK treated mice displayed similar recovery of motor function to the ASOC group in both tasks.

(D) Conversely, in novel object recognition, NSC-mediated improvement was abolished by both  $\alpha$ MT and DHK.

(E) NSC-mediated recovery in NOR was not inhibited by  $\alpha$ MT, but was prevented by DHK.

(F–I) Striatal BDNF was increased by NSCs regardless of  $\alpha$ MT or DHK treatment. TH levels were not significantly altered by NSCs and  $\alpha$ MT co-treatment; however, the activated form of TH (ser31) was reduced to ASOV levels by  $\alpha$ MT despite NSC transplantation (F, H, and I). Data presented as mean  $\pm$  SEM. Western blot graphs presented as the percentage of ASOV group. Fisher's PLSD post hoc <sup>ASOC, ASOC-DHK</sup>  $p < 0.02$ , \* $p < 0.0004$  compared with all other groups ( $n = 6$ –8 mice per group).

See also Figure S4.

GLT-1 are not. Intriguingly, NSC-induced recovery of NOR was blocked by both  $\alpha$ MT and DHK treatments in ASOC mice (Figure 4D;  $F_{(3, 20)} = 13.3$ ; ANOVA  $p = 0.0001$ ), indicating that both GLT-1 and TH activity are important for NSC-mediated improvements in cortical-dependent memory. In contrast, while DHK prevented NSC-mediated improvements in NPR,  $\alpha$ MT co-treatment had no effect on this hippocampal-dependent task, as ASOC- $\alpha$ MT mice per-

formed equivalently to saline-injected ASOC mice (Figure 4E;  $F_{(3, 20)} = 8.2$ ; ANOVA  $p = 0.009$ ). Taken together, these findings indicate that an NSC-induced increase in GLT-1 is critical for both NOR and NPR, but that NSC-mediated DA regulation contributes primarily to motor improvements and NOR but not to hippocampal-dependent NPR.

Importantly, BDNF expression was unaltered by either  $\alpha$ MT or DHK treatments, remaining elevated in all three



NSC-transplanted groups (Figures 4F and 4G;  $F_{(3, 20)} = 6.3$ ; ANOVA  $p = 0.004$ ), suggesting that the observed changes in DA and glutamate systems occur downstream of BDNF signaling. In support of this, TH ser31 phosphorylation was decreased similarly in both ASOV and ASOC- $\alpha$ MT mice but remained elevated in saline- or DHK-injected ASOC mice (Figures 4F, 4H, and 4I;  $F_{(3, 20)} = 5.4$ ; ANOVA  $p = 0.007$ ). These experiments further confirmed the importance of NSC-induced changes in both DA and glutamate systems and their role in NSC-mediated motor and cognitive improvements. They also suggest that motor dysfunction and NSC-mediated recovery are more closely tied to DAergic systems, whereas cognitive tasks are more influenced by NSC-mediated modulation of glutamatergic systems, and that both of these behaviors are strongly influenced by BDNF.

### NSC-Derived BDNF Is Essential for Stem Cell-Induced Cognitive and Motor Benefits

Given the strong correlations between striatal BDNF levels and both motor and cognitive function, we hypothesized that NSC-derived BDNF may be critical for NSC-mediated improvements. We therefore employed a loss-of-function approach to elucidate the role of BDNF in behavioral recovery (Figure 5A). NSCs were stably modified to express a shRNA targeting BDNF, leading to an 84% knockdown of BDNF protein (Figure 5B). Importantly, the resulting cells maintained multipotency as evidenced by unaltered expression of the NSC markers Sox 2 and Musashi (Figure 5B). The effects of transplantation with BDNF<sup>shRNA</sup>-NSCs (BKC) or unaltered NSCs (NSC) were then examined in a new cohort of 12-month-old mice.

As in our initial experiments, transplantation of NSCs increased the amount of time that ASO mice could stay on the Rotarod in comparison to vehicle-injected ASO mice. In contrast, transplantation with BKCs failed to improve performance in ASO mice (Figure 5C;  $F_{(3,16)} = 8.3, 5.6$ ; ANOVA  $p = 0.006$ ), indicating that NSC-derived BDNF is essential for NSC-mediated motor recovery. Performance on the beam traversal task further confirmed these exciting findings, showing that BKCs could not reduce the number of errors made by ASO mice (Figure 5D;  $F_{(3,16)} = 6.2$ ; ANOVA  $p = 0.004$ ). In NOR and NPR cognitive tasks, both WTV and ASOC mice again showed significant preference for the novel object or novel location equivalent to that observed in our initial studies; nevertheless, transplantation with BKCs failed to improve memory for either the familiar object or location (Figures 5E and 5F;  $F_{(3,16)} = 18.4$ ; ANOVA  $p = 0.0001$ ). These results clearly demonstrate that NSC-derived BDNF is necessary for both the motor and cognitive benefits of NSC transplantation.

We next performed biochemical analysis confirming that striatal BDNF levels were indeed increased in ASOC mice

but not in ASO-BKC mice (Figures 5G and 5H;  $F_{(3,20)} = 4.6$ ; ANOVA  $p = 0.01$ ). Likewise, striatal TH ser31 ( $F_{(3,20)} = 4.4$ ; ANOVA  $p = 0.02$ ) and GLT-1 ( $F_{(3,20)} = 1.7$ ; ANOVA  $p = 0.04$ ) were elevated by transplantation of NSCs in ASO mice, but were unchanged between ASOV and ASO-BKC mice, demonstrating that NSC-derived BDNF plays an important role in regulating DAergic and glutamatergic neurotransmitter systems (Figures 5G, 5I, and 5J). Finally, we confirmed that at 1 month following transplantation NSCs continue to produce BDNF, whereas BKCs produce far lower levels (Figure 5K), providing further evidence that NSC-derived BDNF is necessary to elevate striatal BDNF to behaviorally relevant levels. Together these results strongly implicate the necessity of NSC-derived BDNF for both the motor and cognitive benefits of NSC transplantation and the observed changes in DAergic and glutamatergic systems.

### Viral Delivery of BDNF Mimics the Effects of NSCs

Having shown that NSC-derived BDNF expression is essential for both motor and cognitive behavioral recovery, we next asked whether BDNF alone could provide a similar benefit. Both ASO and WT mice received bilateral striatal injections of either AAV2-mCherry or AAV2-mCherry-BDNF (1  $\mu$ l of  $1.5 \times 10^{13}$  viral particles/ml; Figures 6A and 6B). Four weeks later, mice were subjected to the same set of behavioral tasks (Figures 6C–6F). Similar to NSC transplantation, AAV2-BDNF transduction improved both Rotarod (Figure 6C;  $F_{(3,27)} = 7.3$ , ANOVA  $p = 0.01$ ) and beam traversal performance (Figure 6D;  $F_{(3,27)} = 7.8$ , ANOVA  $p = 0.009$ ) in ASO-BDNF mice compared with ASO-mCherry mice, but had no effect in WT groups. In the cognitive tasks, although AAV2-BDNF increased preference for novel object and place in ASO-BDNF mice compared with ASO-mCherry mice, overall differences between all four groups via ANOVA were not significant (Figures 6E and 6F;  $F_{(3,27)} = 1.2$ , ANOVA  $p = 0.06$ ). This suggests that AAV-BDNF leads to similar motor behavioral recovery to NSC-induced BDNF; however, cognitive function is not as effectively restored.

To understand why AAV2-BDNF leads to similar motor recovery as NSC-derived BDNF, but a diminished effect on cognition, we examined striatal BDNF expression. BDNF can undergo various forms of post-translational modification, including phosphorylation and ATP-binding, which can in turn increase its biological activity (König et al., 2008; Ferenz et al., 2012). Intriguingly, in addition to the typical mature 14 kDa BDNF isoform observed in mouse brain lysates, we also detected a second 12 kDa BDNF band in AAV2-BDNF groups. As this lower band may represent an alternatively processed or perhaps unphosphorylated form of BDNF, we analyzed both bands individually. As expected, the 14 kDa BDNF band was



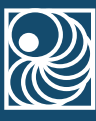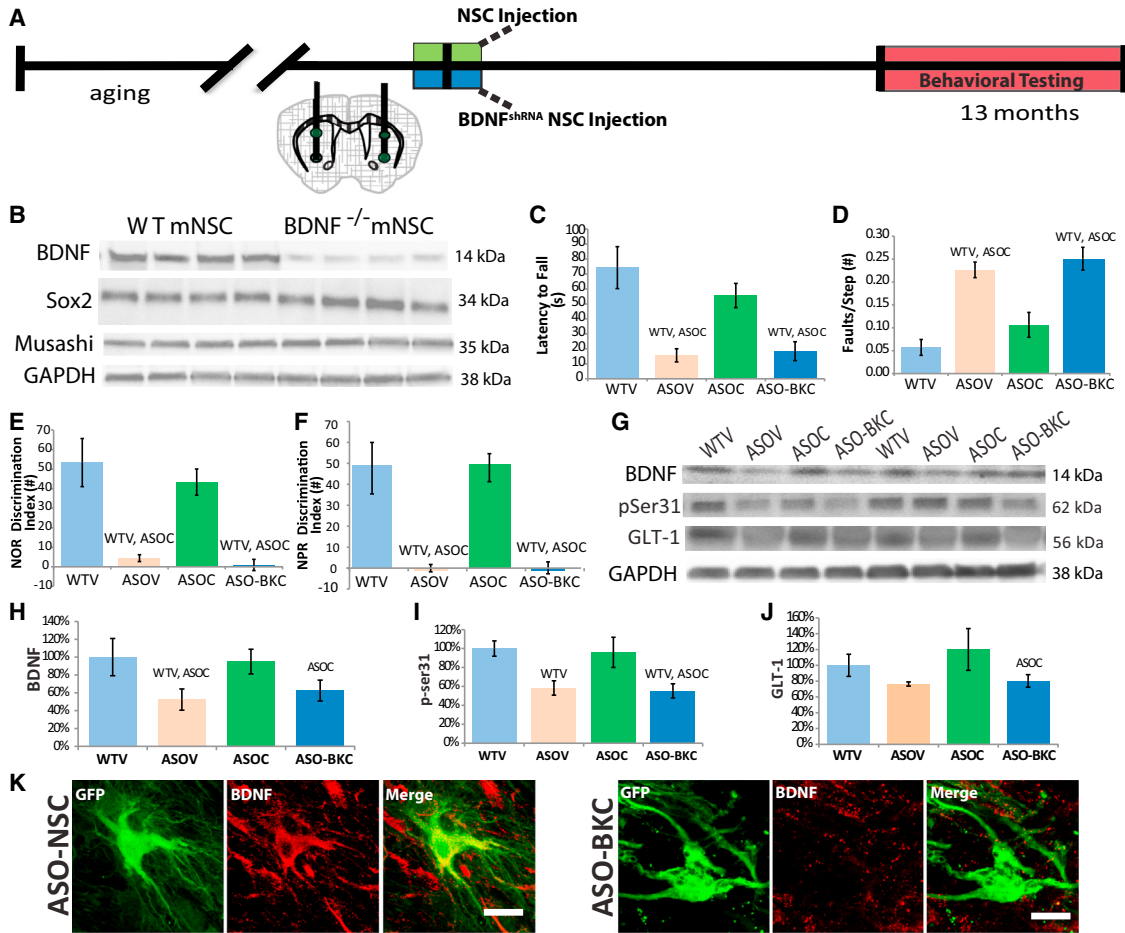

### Figure 5. BDNF Is Necessary for NSC-Induced Motor and Cognitive Rescue

(A and B) A new cohort of ASO and WT mice aged to 12 months were injected bilaterally with either NSCs or BDNF shRNA knockdown NSCs (BKC); behavior was assessed as previously described. NSC BDNF expression was reduced 84% by shRNA in BKCs ( $p < 0.0001$ ), and multipotency was not affected by BDNF knockdown as measured by Sox2 and Musashi expression (B;  $n = 6$  biological replicates).

(C and D) After four weeks, transplantation of BDNF<sup>shRNA</sup>-NSCs into ASO mice failed to improve either Rotarod (C) or beam traversal performance (D).

(E and F) Similarly, NSC-derived BDNF was critical for NSC-mediated improvements in cognitive function in NOR and NPR tasks in ASO mice (E–F).

(G–J) As in the ASOV group, striatal BDNF was not increased in ASO-BKC mice (G and H). BDNF<sup>shRNA</sup>-NSCs were also unable to significantly increase striatal TH ser31 or GLT-1 expression (G, I, and J).

(K) In ASO mice, transplanted NSCs express BDNF (red), whereas BDNF is not detected in transplanted, BDNF<sup>shRNA</sup>-NSCs. Data presented as mean  $\pm$  SEM. Western blot graphs presented as % of WTV group. Fisher's PLSD post hoc  $^{WTV, ASOC} p < 0.04$ ,  $^{WTV} p < 0.02$ ,  $^{ASOC} p < 0.04$  ( $n = 6$ –8 mice per group).

decreased by 50% in ASO- mCherry mice compared with the WT-mCherry group (Figures 6G and 6H;  $F_{(3,27)} = 6.8$ , ANOVA  $p = 0.02$ ). Furthermore, AAV2-BDNF resulted in a significant 37% increase in 14kDa BDNF levels in ASO-AAV-BDNF mice. In contrast, analysis of the 12 kDa band revealed a different pattern of expression, exhibiting an over 5-fold increase in both AAV2-BDNF groups versus AAV2-mCherry groups (Figures 6G and 6I;  $F_{(3,27)} = 42.5$ , ANOVA  $p < 0.0001$ ). Despite this high elevation of

BDNF by AAV transduction, there was no effect on monomeric h- $\alpha$ -syn expression (Figures 6G and 6J). In order to determine why AAV2-BDNF was not able to significantly restore cognitive function despite very high levels of the 12 kDa BDNF, we compared expression levels directly to NSC-transplanted ASO mice whose behavior was fully rescued. Interestingly, we find that in contrast to ASO-BDNF mice, NSC transplantation primarily increases levels of the 14kDa BDNF protein (Figure 6K). Furthermore,

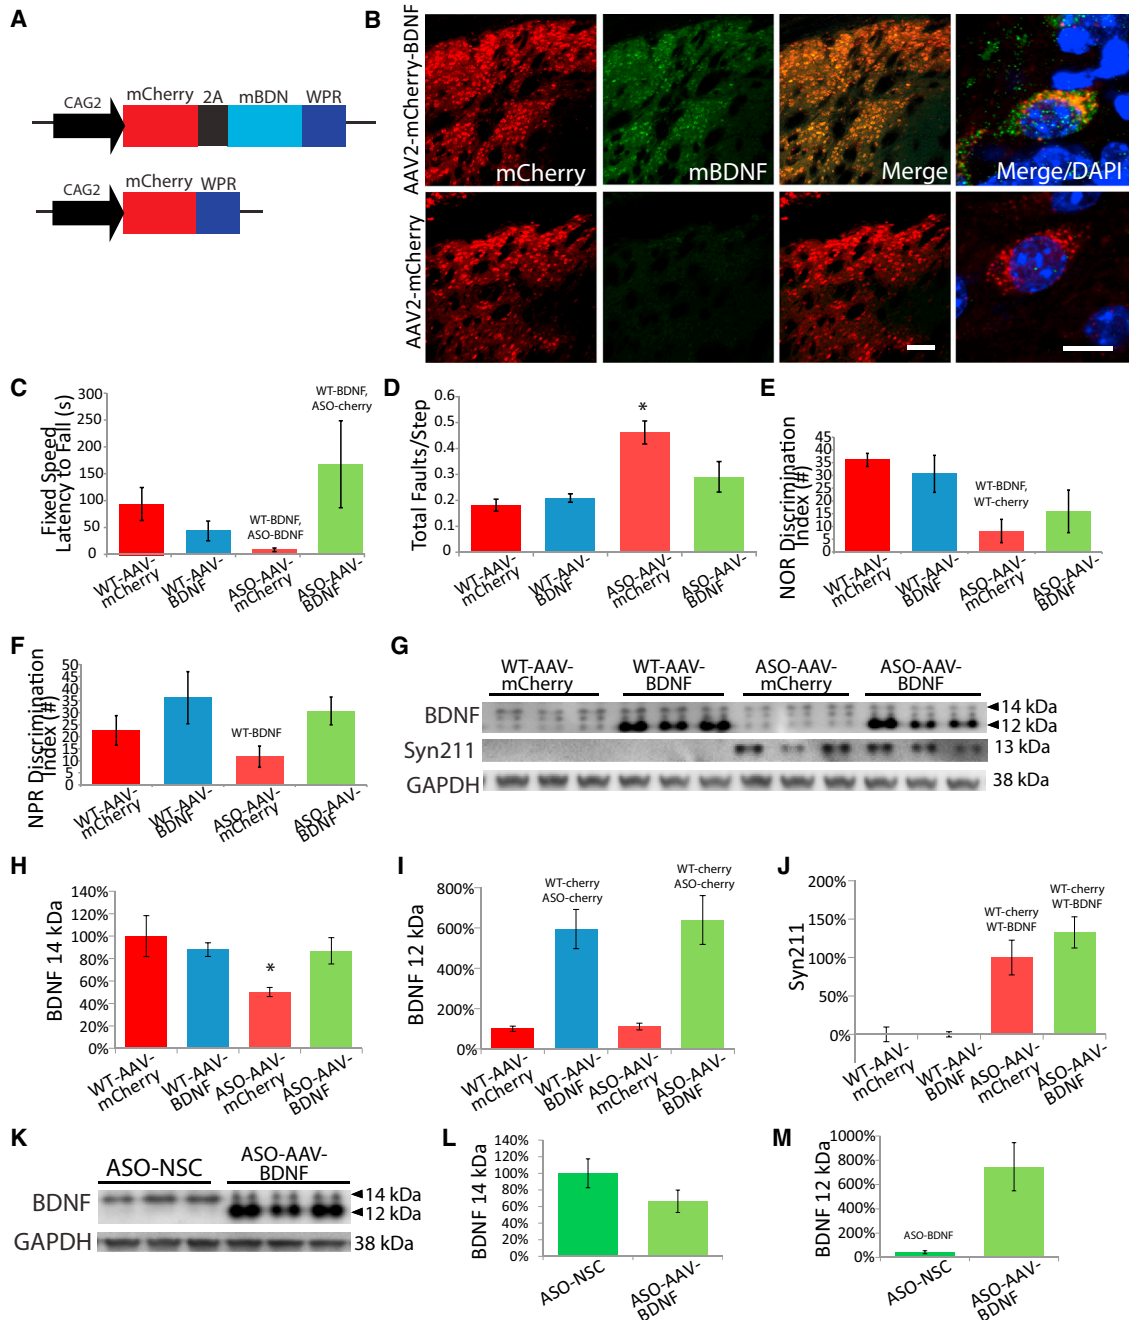

**Figure 6. Viral Delivery of BDNF Partially Mimics the Effects of NSCs on Motor and Cognitive Function**

(A) A new cohort of ASO and WT mice aged 12 months were bilaterally injected with either AAV2-mCherry-2A-BDNF or AAV2-mCherry. (B) AAV2-BDNF expression at the injection site (scale bar represents 100  $\mu$ m) and subcellular localization of BDNF (scale bar represents 10  $\mu$ m) were verified by immunohistochemistry (B). (C and D) AAV2-BDNF reversed motor deficits in ASO mice for both Rotarod (C) and beam traversal (D) tasks. (E and F) In novel object and place recognition tasks, AAV2-BDNF modestly improved performance, although these effects were not significant (E and F). (G–J) Two bands representing mature BDNF were observed by western blot in AAV2-BDNF-treated mice (G). The 14 kDa band, which was decreased in AAV2-mCherry-treated ASO mice, was significantly increased by AAV2-BDNF (G and H). The protein at 12 kDa was dramatically increased by AAV2-BDNF expression in both WT and ASO mice (G and I). Monomeric h- $\alpha$ -syn (Syn211) was unaltered by AAV2-BDNF expression (G and J).

(legend continued on next page)

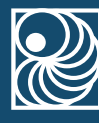

ASO-BDNF mice express modestly lower levels of the 14 kDa form and much higher levels of the 12kDa isoform compared with ASO-NSC mice (Figures 6L and 6M;  $F_{(3,27)} = 12.5$ , ANOVA  $p < 0.005$ ).

Taken together, these data suggest that differences in post-translational modification of BDNF provided by NSCs versus AAV likely explain the shift from the typical 14 kDa endogenous BDNF signal to a predominant 12 kDa BDNF band in AAV-BDNF samples. The addition of a single phosphorylation could for example readily shift the electrophoretic mobility of a given protein by the observed 2 kDa. These intriguing results could provide a potential explanation for why AAV-mediated BDNF delivery leads to a less robust effect on cognition, although future studies will clearly be needed to better understand the influence of post-translational modifications on BDNF-induced behavioral effects.

## DISCUSSION

Here we demonstrate that transplantation of NSCs can dramatically improve both cognitive and motor function in a progressive transgenic model of DLB/PDD. Interestingly, the benefits occur without altering  $\alpha$ -syn levels or inclusion number, instead revealing a critical role for BDNF-induced modulation of DAergic and glutamatergic systems in both the disease process and NSC-mediated recovery. We also show that although viral delivery of BDNF can mimic several outcomes of NSC transplantation, NSCs provide a greater benefit to cognitive function, suggesting that NSCs may be a more effective vehicle for BDNF-dependent recovery. Together, these studies demonstrate that transplantation of preferentially gliogenic NSCs could offer a promising new therapeutic approach to treat both the motor and understudied cognitive components of synucleinopathies.

Currently approved therapies for DLB/PDD primarily focus on strategies to replace or compensate for missing DA via L-DOPA therapy or electrical modulation of DA pathways (Bonelli et al., 2004; McKeith et al., 2005). While these approaches can provide meaningful relief of motor dysfunction, their effect on cognitive symptoms appears to be marginal and inconsistent (Aarts et al., 2014; Robbins and Cools, 2014) and may even accelerate global cognitive decline (Kim et al., 2014). Although DLB can include DA loss in the nigrostriatal pathway, it is modest (Colloby

et al., 2012), and DA transporter binding does not correlate to cognitive decline in DLB (Ziebell et al., 2013). This collective evidence strongly argues for an alternative to DA therapy for DLB that is catered toward the specific consequences of synucleinopathy. The importance of  $\alpha$ -synuclein in DLB/PDD is highlighted by the strong correlation between  $\alpha$ -syn accumulation and cognitive dysfunction in patients (Halliday et al., 2014). Indeed, a recent report confirmed that cerebrospinal fluid levels of  $\alpha$ -syn correlates well with cognitive decline, but not with motor dysfunction (Stewart et al., 2014). The testing and development of treatments that could relieve the cognitive symptoms of DLB/PDD therefore likely requires the use of models that exhibit robust  $\alpha$ -syn pathology with cognitive deficits, such as the ASO model employed here.

Interestingly, BDNF has also previously been implicated in the development of synucleinopathies. Specifically, haploinsufficiency for the TrkB receptor results in nigral cell loss and accumulation of  $\alpha$ -syn in aged mice (von Bohlen und Halbach et al., 2005). Changes in  $\alpha$ -syn can in turn influence BDNF, as overexpression of WT  $\alpha$ -syn in primary neurons reduces BDNF production by suppressing the transactivation of CREB and NFAT, two transcription factors that can regulate BDNF expression (Saha et al., 2000; Yuan et al., 2010). It is likely that introduction of supplemental NSC or AAV2 derived BDNF was able to overcome this deficiency despite the persistence of  $\alpha$ -syn expression.

Although the ASO model does not exhibit substantial neuronal loss, the correlations between DA and glutamatergic proteins and behavioral function suggest that ASO mice nicely model the detrimental effects of  $\alpha$ -syn accumulation on these transmitter systems. Perhaps more remarkable are the distinct associations of NSC-induced DA changes with motor improvement and glutamatergic changes with cognitive improvement (Figures 3 and 4). In support of our findings, it was recently shown that striatal DA transmission is disrupted in BDNF-deficient mice (Bosse et al., 2012); thus, the reductions in TH and phospho-TH that we observe in ASO mice are likely influenced by the diminished levels of BDNF in these mice. In the ASO model, changes in TH and phospho-TH induced by NSC transplantation likely reflect an enhancement of activity and function of existing nigrostriatal projections that in turn improves behavior (Hyman et al., 1994; Siuciak et al., 1996). Supporting this notion, pharmacological inhibition of TH in the presence of NSC transplants prevented NSC-induced motor and cortical-dependent cognitive

---

(K–M) Finally, BDNF expression levels were compared between ASO-AAV-BDNF and ASO-NSC mice (K). AAV2-BDNF resulted in slightly although not significantly lower levels of 14 kDa BDNF compared with NSC transplantation (K and L) but a 500% increase in 12 kDa BDNF relative to NSCs (K and M). Data presented as mean  $\pm$  SEM. Western blot graphs presented as a percentage of the WTv group (H–J) or ASO-NSC (L and M). Fisher's PLSD post hoc  $^{WT-BDNF} p < 0.04$ ,  $^{WT-BDNF, ASO-Cherry} p < 0.03$ ,  $^{WT-BDNF, WT-Cherry} p < 0.01$ ,  $^{WT-Cherry, ASO-Cherry} p < 0.005$ ,  $^{WT-Cherry, WT-BDNF} p < 0.0004$ ,  $^{ASO-BDNF} p < 0.005$ , \* $p < 0.05$  compared to all other groups (n = 7–9 mice per group).



benefits (Figure 4). Fascinatingly, NSC-mediated changes in GLT-1 function were necessary for improvement in both cortical- and hippocampal-dependent cognitive tasks, but not motor performance. Although GLT-1 expression is altered by NSC transplantation regardless of  $\alpha$ -syn overexpression, this marker may indicate an increase in NSC-derived astrocytes, which are in turn stimulated to produce BDNF in ASO mice (Figure 2D). Deficiency of striatal VGLUT-1 (Granseth et al., 2015) or GLT-1 (Hsu et al., 2015) can both lead to cognitive deficits, further supporting the hypothesis that NSC-induced increases in these transporters improves cognition. Finally, expression and distribution of both VGLUT-1 (Melo et al., 2013) and GLT-1 (Rodriguez-Kern et al., 2003) can be influenced by BDNF, further substantiating an upstream effector role for this neurotrophin in restoring balance to glutamate neurotransmission. The dissociation of the effects of NSCs on DAergic and glutamatergic systems and motor and cognitive function suggests that a balanced regulation of both striatal DA and corticostriatal glutamate could be key to rescuing  $\alpha$ -syn-related deficits.

The necessity of BDNF in NSC-mediated behavioral improvement in ASO mice is further confirmed by the inability of BDNF<sup>shRNA</sup>-NSCs to rescue either motor or cognitive function. In contrast, AAV2-BDNF mimics the effects of NSC transplantation on motor function and partially improves cognitive function. The less striking impact of AAV2-BDNF compared with NSC delivery may be explained by differences in the post-translational modification of BDNF (Mowla et al., 2001; König et al., 2008; Ferenz et al., 2012). Alternatively, it is plausible that additional NSC-derived factors might enhance the efficacy of NSC transplantation (Redmond et al., 2007). In conclusion, our data strongly suggest that striatal NSC transplantation and the resulting elevation of BDNF could provide a promising therapeutic approach to restore dopaminergic and glutamatergic neurotransmission and motor and cognitive function in in DLB/PDD.

## EXPERIMENTAL PROCEDURES

### Animals, NSC Transplantation, AAV-BDNF Injection, and Behavior

All procedures were performed in strict accordance with the UC Irvine and NIH animal use regulations and were approved by an institutional review board. Hemizygous ASO mice have been previously characterized and are maintained on a purebred C57B/6 background (Masliah et al., 2000). Hippocampal/cortical GFP-NSCs were microdissected from syngeneic GFP-transgenic mice at postnatal day 1, grown as adherent monolayers, and transplanted at passage 15 as previously described (Mizumoto et al., 2003, Blurton-Jones et al., 2009). BDNF<sup>shRNA</sup> GFP-NSCs were also generated via lentiviral delivery and stable selection of a shRNA

construct targeting murine BDNF (Blurton-Jones et al., 2009). Twelve-month-old ASO and WT mice were randomly assigned to a treatment group and either vehicle, or 50,000 NSCs per site (1  $\mu$ l volume, two sites per side) were transplanted bilaterally into the dorsal striatum (Bregma +0.03 AP,  $\pm$ 2.0 ML,  $-3.0$  and  $-3.5$  DV; Supplemental Experimental Procedures). For AAV experiments, AAV2-mCherry or AAV2-mCherry-2A-BDNF (Vector Biolabs) were injected bilaterally at the same striatal coordinates (1  $\mu$ l of  $1.5 \times 10^{13}$  viral particles/ml). Behavioral studies were performed and analyzed blinded and examined motor function using Rotarod, pole, and beam traversal tests, whereas cortical- and hippocampal-dependent learning and memory were examined using novel object and NPR, respectively (Supplemental Experimental Procedures).

### Biochemical, Histological, and Statistical Analyses

At 6 weeks after transplantation, mice were sacrificed by Euthasol and transcardial perfusion (Supplemental Experimental Procedures). For biochemical assessment, tissue was microdissected from flash-frozen half brains; 40- $\mu$ m sections of post-fixed half brains were processed for immunohistochemistry and imaged via confocal microscopy (Supplemental Experimental Procedures). All animals were randomly assigned to treatment groups with randomly generated identification codes to keep the researcher blind throughout testing and analysis. Comparisons between multiple groups utilized two-way ANOVA followed by Fisher's PLSD post hoc tests (Supplemental Experimental Procedures). Figure asterisks denote significance difference from all other groups; a significant difference from specific groups is denoted with the name of that group in place of asterisks.

## SUPPLEMENTAL INFORMATION

Supplemental Information includes Supplemental Experimental Procedures and Figures S1–S4 and can be found with this article online at <http://dx.doi.org/10.1016/j.stemcr.2015.09.008>.

## AUTHOR CONTRIBUTIONS

Conception and design, transplantation studies, pharmacological studies, data collection and analysis, manuscript writing, N.R.S.G.; Protein isolation, data collection and analysis, J.C.; Genotyping, western blots, immunohistochemistry, A.P., S.S., and G.F.; Establishment of ASO colony, J.D.; Donation of ASO founder mice, conception, E.M.; Conception and design, confocal microscopy, generation of BDNF<sup>shRNA</sup>-NSC line, financial support, and manuscript writing, M.B.J. All authors read and approved the final manuscript.

## ACKNOWLEDGMENTS

This work was supported by an NSF fellowship (N.R.S.G.) and departmental startup funds AG029378, AG048099, AG16573 (M.B.J.), AG022074, AG18440, and AG10435 (E.M.).

Received: March 30, 2015

Revised: September 9, 2015

Accepted: September 10, 2015

Published: October 15, 2015





## REFERENCES

- Aarts, E., Nusselein, A.A., Smittenaar, P., Helmich, R.C., Bloem, B.R., and Cools, R. (2014). Greater striatal responses to medication in Parkinson's disease are associated with better task-switching but worse reward performance. *Neuropsychologia* 62, 390–397.
- Albin, R.L., Young, A.B., and Penney, J.B. (1995). The functional anatomy of disorders of the basal ganglia. *Trends Neurosci.* 18, 63–64.
- Amschl, D., Neddens, J., Havas, D., Flunkert, S., Rabl, R., Römer, H., Rockenstein, E., Masliah, E., Windisch, M., and Hutter-Paier, B. (2013). Time course and progression of wild type  $\alpha$ -synuclein accumulation in a transgenic mouse model. *BMC Neurosci.* 14, 6.
- Bambah-Mukku, D., Travaglia, A., Chen, D.Y., Pollonini, G., and Alberini, C.M. (2014). A positive autoregulatory BDNF feedback loop via C/EBP $\beta$  mediates hippocampal memory consolidation. *J. Neurosci.* 34, 12547–12559.
- Blurton-Jones, M., Kitazawa, M., Martinez-Coria, H., Castello, N.A., Müller, F.J., Loring, J.F., Yamasaki, T.R., Poon, W.W., Green, K.N., and LaFerla, F.M. (2009). Neural stem cells improve cognition via BDNF in a transgenic model of Alzheimer disease. *Proc. Natl. Acad. Sci. USA* 106, 13594–13599.
- Bonelli, S.B., Ransmayr, G., Steffelbauer, M., Lukas, T., Lampl, C., and Deibl, M. (2004). L-dopa responsiveness in dementia with Lewy bodies, Parkinson disease with and without dementia. *Neurology* 63, 376–378.
- Bosse, K.E., Maina, F.K., Birbeck, J.A., France, M.M., Roberts, J.J., Colombo, M.L., and Mathews, T.A. (2012). Aberrant striatal dopamine transmitter dynamics in brain-derived neurotrophic factor-deficient mice. *J. Neurochem.* 120, 385–395.
- Canossa, M., Griesbeck, O., Berninger, B., Campana, G., Kolbeck, R., and Thoenen, H. (1997). Neurotrophin release by neurotrophins: implications for activity-dependent neuronal plasticity. *Proc. Natl. Acad. Sci. USA* 94, 13279–13286.
- Colloby, S.J., McParland, S., O'Brien, J.T., and Attems, J. (2012). Neuropathological correlates of dopaminergic imaging in Alzheimer's disease and Lewy body dementias. *Brain* 135, 2798–2808.
- Desplats, P., Lee, H.J., Bae, E.J., Patrick, C., Rockenstein, E., Crews, L., Spencer, B., Masliah, E., and Lee, S.J. (2009). Inclusion formation and neuronal cell death through neuron-to-neuron transmission of alpha-synuclein. *Proc. Natl. Acad. Sci. USA* 106, 13010–13015.
- Docherty, M.J., and Burn, D.J. (2010). Parkinson's disease dementia. *Curr. Neurol. Neurosci. Rep.* 10, 292–298.
- Dubois, B., and Pillon, B. (1997). Cognitive deficits in Parkinson's disease. *J. Neurol.* 244, 2–8.
- Ferenz, K.B., Gast, R.E., Rose, K., Finger, I.E., Hasche, A., and Krieglstein, J. (2012). Nerve growth factor and brain-derived neurotrophic factor but not granulocyte colony-stimulating factor, nimodipine and dizocilpine, require ATP for neuroprotective activity after oxygen-glucose deprivation of primary neurons. *Brain Res.* 1448, 20–26.
- Fernagut, P.O., Hutson, C.B., Fleming, S.M., Tetreault, N.A., Salcedo, J., Masliah, E., and Chesselet, M.F. (2007). Behavioral and histopathological consequences of paraquat intoxication in mice: effects of alpha-synuclein over-expression. *Synapse* 61, 991–1001.
- Gottmann, K., Mittmann, T., and Lessmann, V. (2009). BDNF signaling in the formation, maturation and plasticity of glutamatergic and GABAergic synapses. *Exp. Brain Res.* 199, 203–234.
- Granseth, B., Andersson, F.K., and Lindström, S.H. (2015). The initial stage of reversal learning is impaired in mice hemizygous for the vesicular glutamate transporter (VGLUT1). *Genes Brain Behav.* 14, 477–485.
- Greenamyre, J.T. (1993). Glutamate-dopamine interactions in the basal ganglia: relationship to Parkinson's disease. *J. Neural Transm.* 91, 255–269.
- Halliday, G.M., Leverenz, J.B., Schneider, J.S., and Adler, C.H. (2014). The neurobiological basis of cognitive impairment in Parkinson's disease. *Mov. Disord.* 29, 634–650.
- Hansen, C., Angot, E., Bergström, A.L., Steiner, J.A., Pieri, L., Paul, G., Outeiro, T.F., Melki, R., Kallunki, P., Fog, K., et al. (2011).  $\alpha$ -Synuclein propagates from mouse brain to grafted dopaminergic neurons and seeds aggregation in cultured human cells. *J. Clin. Invest.* 121, 715–725.
- Herrera, D.G., Garcia-Verdugo, J.M., and Alvarez-Buylla, A. (1999). Adult-derived neural precursors transplanted into multiple regions in the adult brain. *Ann. Neurol.* 46, 867–877.
- Hsu, C.Y., Hung, C.S., Chang, H.M., Liao, W.C., Ho, S.C., and Ho, Y.J. (2015). Ceftriaxone prevents and reverses behavioral and neuronal deficits in an MPTP-induced animal model of Parkinson's disease dementia. *Neuropharmacology* 91, 43–56.
- Hyman, C., Juhasz, M., Jackson, C., Wright, P., Ip, N.Y., and Lindsay, R.M. (1994). Overlapping and distinct actions of the neurotrophins BDNF, NT-3, and NT-4/5 on cultured dopaminergic and GABAergic neurons of the ventral mesencephalon. *J. Neurosci.* 14, 335–347.
- Kim, H.J., Jeon, B.S., Paek, S.H., Lee, K.M., Kim, J.Y., Lee, J.Y., Kim, H.J., Yun, J.Y., Kim, Y.E., Yang, H.J., and Ehm, G. (2014). Long-term cognitive outcome of bilateral subthalamic deep brain stimulation in Parkinson's disease. *J. Neurol.* 261, 1090–1096.
- König, S., Hasche, A., Pallast, S., Krieglstein, J., and Klumpp, S. (2008). Detection of ATP-binding to growth factors. *J. Am. Soc. Mass Spectrom.* 19, 91–95.
- Lees, A.J., and Smith, E. (1983). Cognitive deficits in the early stages of Parkinson's disease. *Brain* 106, 257–270.
- Leverenz, J.B., Watson, G.S., Shofer, J., Zabetian, C.P., Zhang, J., and Montine, T.J. (2011). Cerebrospinal fluid biomarkers and cognitive performance in non-demented patients with Parkinson's disease. *Parkinsonism Relat. Disord.* 17, 61–64.
- Marsh, S.E., and Blurton-Jones, M. (2012). Examining the mechanisms that link  $\beta$ -amyloid and  $\alpha$ -synuclein pathologies. *Alzheimers Res. Ther.* 4, 11.
- Masliah, E., Rockenstein, E., Veinbergs, I., Mallory, M., Hashimoto, M., Takeda, A., Sagara, Y., Sisk, A., and Mucke, L. (2000). Dopaminergic loss and inclusion body formation in alpha-synuclein mice: implications for neurodegenerative disorders. *Science* 287, 1265–1269.
- Masliah, E., Rockenstein, E., Mante, M., Crews, L., Spencer, B., Adame, A., Patrick, C., Trejo, M., Ubhi, K., Rohn, T.T., et al.



- (2011). Passive immunization reduces behavioral and neuropathological deficits in an alpha-synuclein transgenic model of Lewy body disease. *PLoS ONE* 6, e19338.
- Massie, A., Goursaud, S., Schallier, A., Vermoesen, K., Meshul, C.K., Hermans, E., and Michotte, Y. (2010). Time-dependent changes in GLT-1 functioning in striatum of hemi-Parkinson rats. *Neurochem. Int.* 57, 572–578.
- Mayo, M.C., and Bordelon, Y. (2014). Dementia with Lewy bodies. *Semin. Neurol.* 34, 182–188.
- McKeith, I.G., Dickson, D.W., Lowe, J., Emre, M., O'Brien, J.T., Feldman, H., Cummings, J., Duda, J.E., Lippa, C., Perry, E.K., et al.; Consortium on DLB (2005). Diagnosis and management of dementia with Lewy bodies: third report of the DLB Consortium. *Neurology* 65, 1863–1872.
- Melo, C.V., Mele, M., Curcio, M., Comprido, D., Silva, C.G., and Duarte, C.B. (2013). BDNF regulates the expression and distribution of vesicular glutamate transporters in cultured hippocampal neurons. *PLoS ONE* 8, e53793.
- Mizumoto, H., Mizumoto, K., Shatos, M.A., Klassen, H., and Young, M.J. (2003). Retinal transplantation of neural progenitor cells derived from the brain of GFP transgenic mice. *Vision Res.* 43, 1699–1708.
- Mowla, S.J., Farhadi, H.F., Pareek, S., Atwal, J.K., Morris, S.J., Seidah, N.G., and Murphy, R.A. (2001). Biosynthesis and post-translational processing of the precursor to brain-derived neurotrophic factor. *J. Biol. Chem.* 276, 12660–12666.
- Pita-Almenar, J.D., Zou, S., Colbert, C.M., and Eskin, A. (2012). Relationship between increase in astrocytic GLT-1 glutamate transport and late-LTP. *Learn. Mem.* 19, 615–626.
- Redmond, D.E., Jr., Bjugstad, K.B., Teng, Y.D., Ourednik, V., Ourednik, J., Wakeman, D.R., Parsons, X.H., Gonzalez, R., Blanchard, B.C., Kim, S.U., et al. (2007). Behavioral improvement in a primate Parkinson's model is associated with multiple homeostatic effects of human neural stem cells. *Proc. Natl. Acad. Sci. USA* 104, 12175–12180.
- Robbins, T.W., and Cools, R. (2014). Cognitive deficits in Parkinson's disease: a cognitive neuroscience perspective. *Mov. Disord.* 29, 597–607.
- Rockenstein, E., Mallory, M., Hashimoto, M., Song, D., Shults, C.W., Lang, I., and Masliah, E. (2002). Differential neuropathological alterations in transgenic mice expressing alpha-synuclein from the platelet-derived growth factor and Thy-1 promoters. *J. Neurosci. Res.* 68, 568–578.
- Rodriguez-Kern, A., Gegelashvili, M., Schousboe, A., Zhang, J., Sung, L., and Gegelashvili, G. (2003). Beta-amyloid and brain-derived neurotrophic factor, BDNF, up-regulate the expression of glutamate transporter GLT-1/EAAT2 via different signaling pathways utilizing transcription factor NF-kappaB. *Neurochem. Int.* 43, 363–370.
- Saha, A.R., Ninkina, N.N., Hanger, D.P., Anderton, B.H., Davies, A.M., and Buchman, V.L. (2000). Induction of neuronal death by alpha-synuclein. *Eur. J. Neurosci.* 12, 3073–3077.
- Salvatore, M.F., Davis, R.W., Arnold, J.C., and Chotibut, T. (2012). Transient striatal GLT-1 blockade increases EAAC1 expression, glutamate reuptake, and decreases tyrosine hydroxylase phosphorylation at ser(19). *Exp. Neurol.* 234, 428–436.
- Siuciak, J.A., Boylan, C., Fritsche, M., Altar, C.A., and Lindsay, R.M. (1996). BDNF increases monoaminergic activity in rat brain following intracerebroventricular or intraparenchymal administration. *Brain Res.* 710, 11–20.
- Stewart, T., Liu, C., Ghingina, C., Cain, K.C., Auinger, P., Cholerton, B., Shi, M., and Zhang, J.; Parkinson Study Group DATATOP Investigators (2014). Cerebrospinal fluid  $\alpha$ -synuclein predicts cognitive decline in Parkinson disease progression in the DATATOP cohort. *Am. J. Pathol.* 184, 966–975.
- Vann Jones, S.A., and O'Brien, J.T. (2014). The prevalence and incidence of dementia with Lewy bodies: a systematic review of population and clinical studies. *Psychol. Med.* 44, 673–683.
- von Bohlen und Halbach, O., Minichiello, L., and Unsicker, K. (2005). Haploinsufficiency for trkB and trkC receptors induces cell loss and accumulation of alpha-synuclein in the substantia nigra. *FASEB J.* 19, 1740–1742.
- Yamasaki, T.R., Blurton-Jones, M., Morrisette, D.A., Kitazawa, M., Oddo, S., and LaFerla, F.M. (2007). Neural stem cells improve memory in an inducible mouse model of neuronal loss. *J. Neurosci.* 27, 11925–11933.
- Yuan, Y., Sun, J., Zhao, M., Hu, J., Wang, X., Du, G., and Chen, N.H. (2010). Overexpression of alpha-synuclein down-regulates BDNF expression. *Cell. Mol. Neurobiol.* 30, 939–946.
- Ziebell, M., Andersen, B.B., Pinborg, L.H., Knudsen, G.M., Stokholm, J., Thomsen, G., Karlsborg, M., Høgh, P., Mørk, M.L., and Hasselbalch, S.G. (2013). Striatal dopamine transporter binding does not correlate with clinical severity in dementia with Lewy bodies. *J. Nucl. Med.* 54, 1072–1076.

**Stem Cell Reports, Volume 5**

**Supplemental Information**

**Neural Stem Cells Rescue Cognitive and Motor Dysfunction  
in a Transgenic Model of Dementia with Lewy Bodies  
through a BDNF-Dependent Mechanism**

**Natalie R.S. Goldberg, Jacqueline Caesar, Ashley Park, Shawn Sedgh, Gilana  
Finogenov, Eliezer Masliah, Joy Davis, and Mathew Blurton-Jones**

## SUPPLEMENTAL FIGURES, LEGENDS & REFERENCES

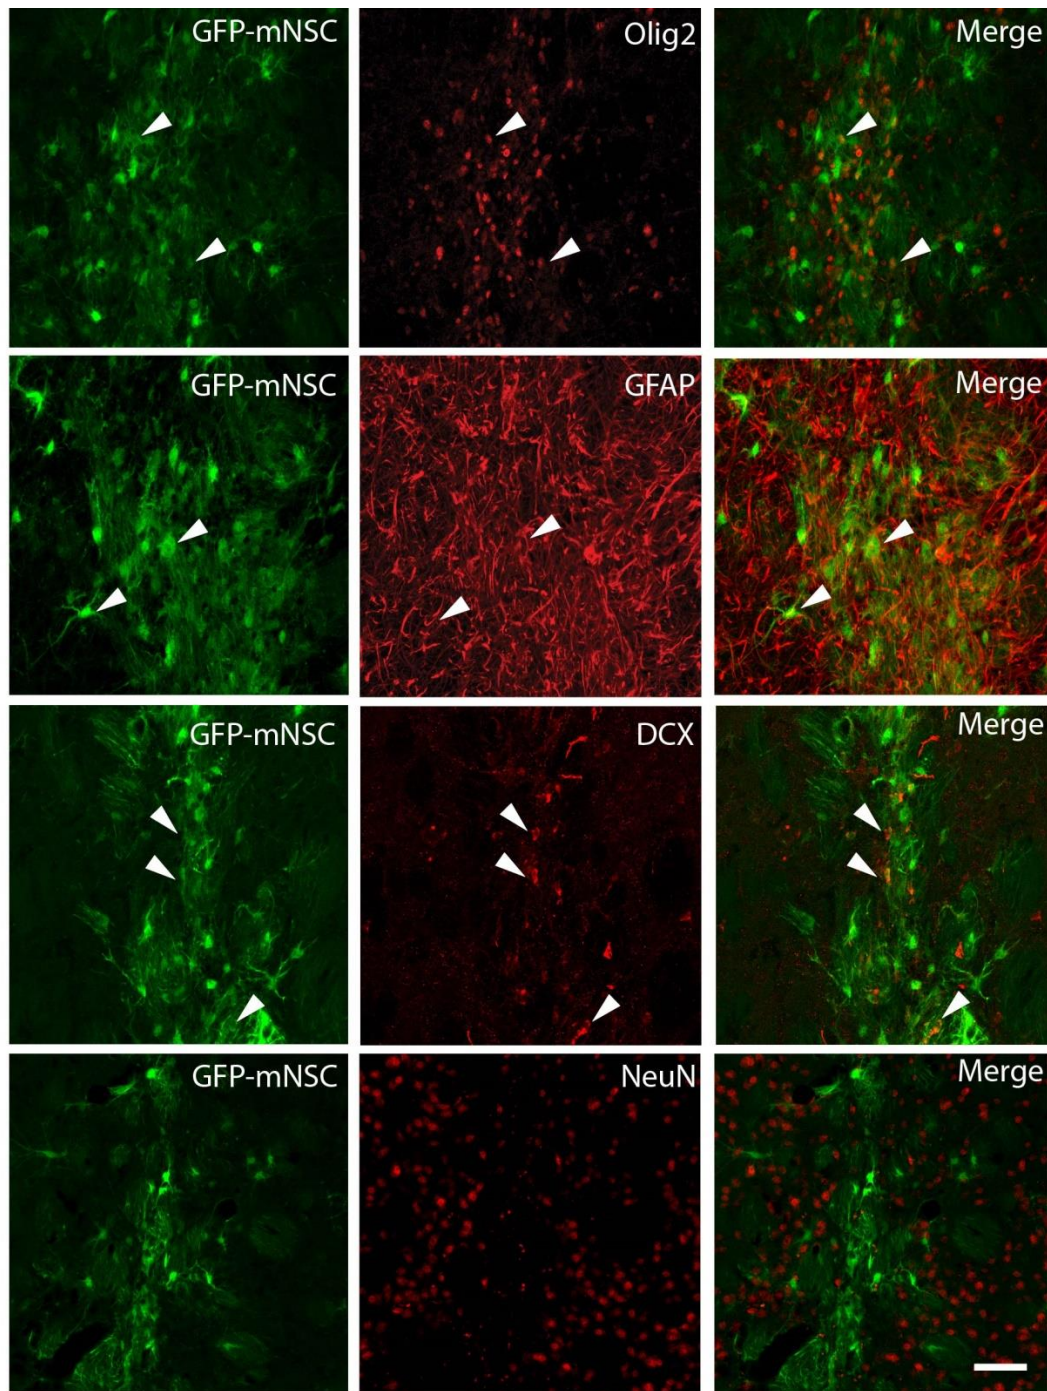

**SI Figure 1. Transplanted GFP-NSCs survive and differentiate after 6 weeks, Related to Figure 1.**

Low-magnification confocal images demonstrate that GFP-NSCs can adopt early oligodendrocytic (Olig2), glial (GFAP) or neuronal (DCX) phenotypes, but do not yet express a more mature neuronal marker (NeuN). Scalebar=50  $\mu$ m.



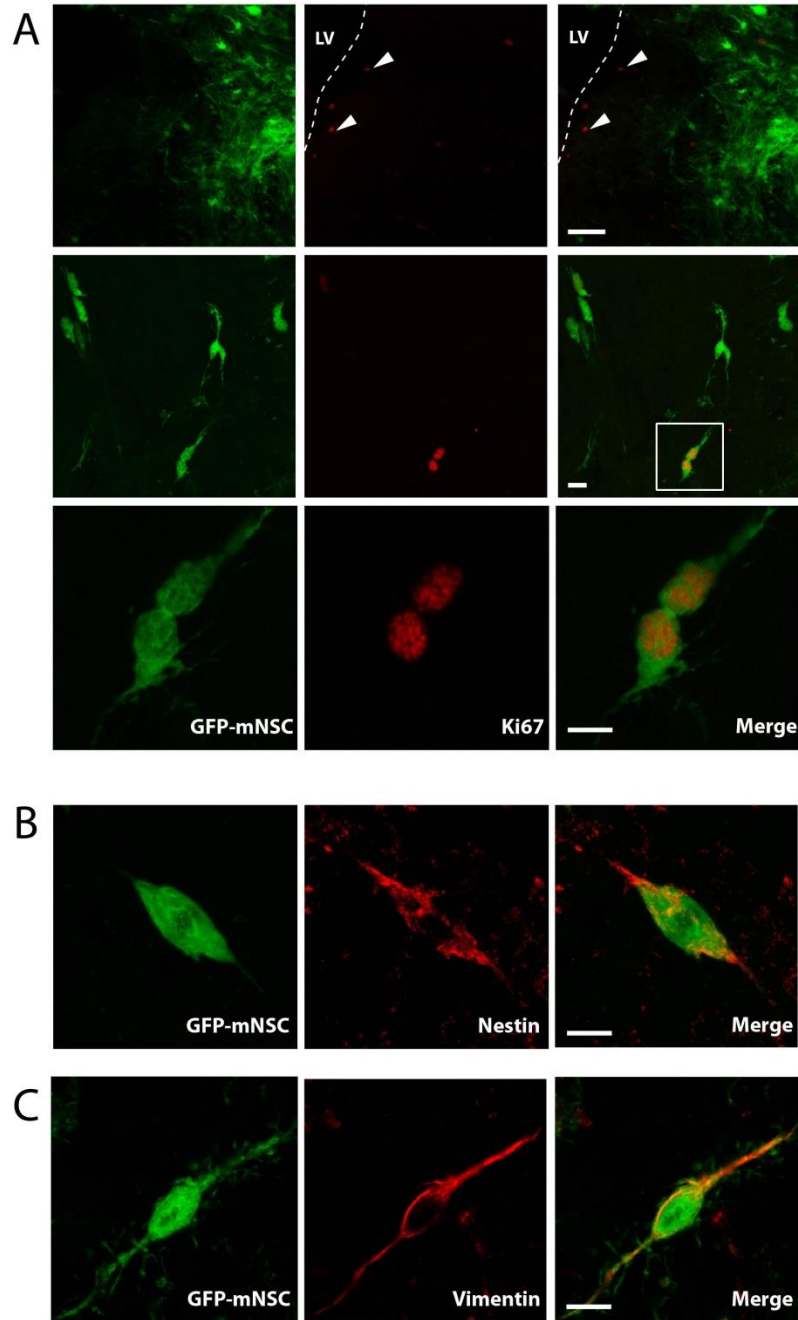

**SI Figure 2. Transplanted GFP-NSCs that express markers of multipotency and proliferation are infrequent and distal to the injection site, Related to Figure 1.** Endogenous cells near the lateral ventricle (LV) express the proliferation marker Ki67, but GFP-NSCs in the dorsal striatum do not (A). However rare examples of GFP cells that express the mitotic marker Ki67 are observed in areas that are distal to the injection site a (A; Scalebar=100  $\mu$ m, 20  $\mu$ m, 10  $\mu$ m). Distally migrating NSCs also occasionally express Nestin (B) or Vimentin (C). Scalebar=10  $\mu$ m B,C.

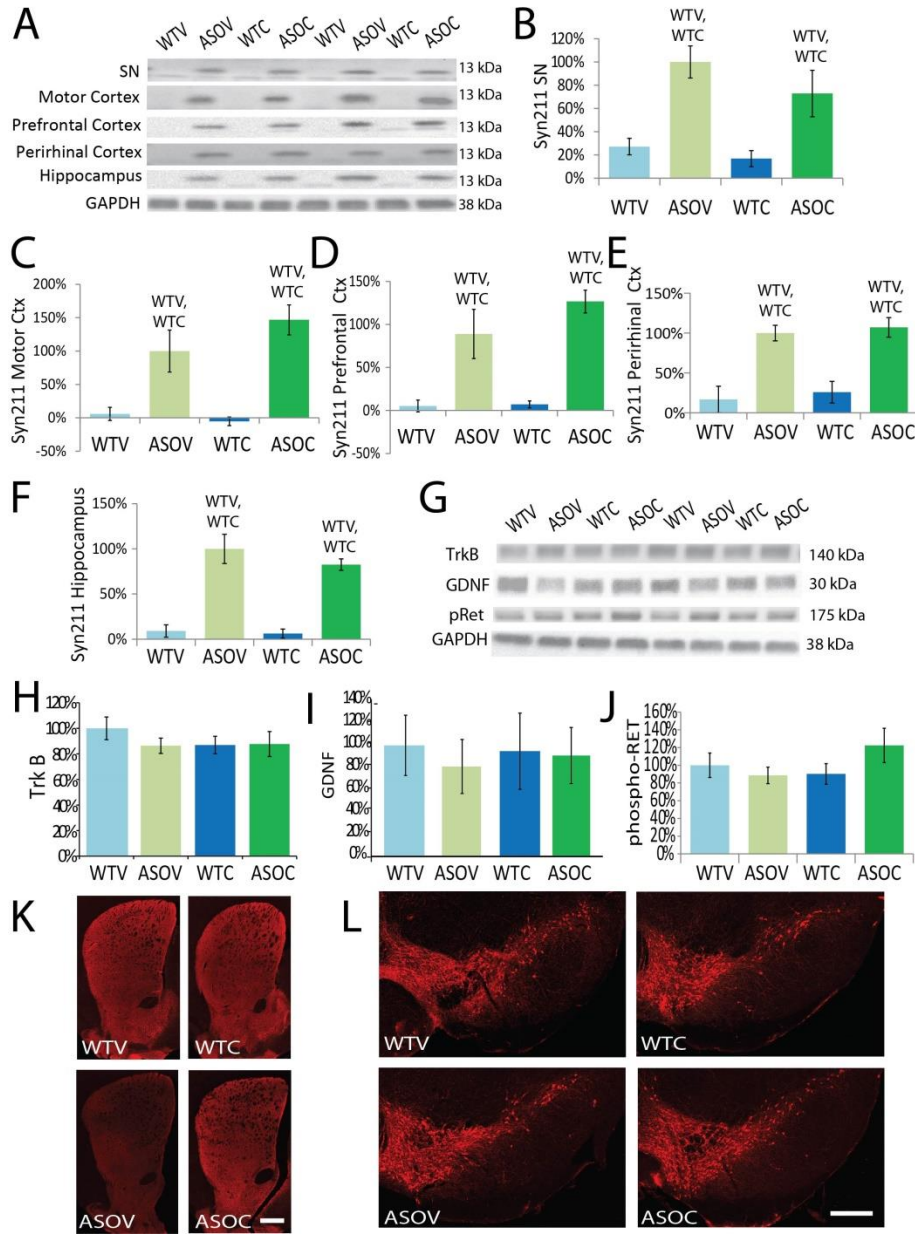

**SI Figure 3. Effects of NSC transplantation on  $\alpha$ -synuclein, neurotrophins, and tyrosine hydroxylase, Related to Figure 2.** Western blot analysis of h- $\alpha$ -syn (Syn211) in 5 microdissected brain regions was not significantly altered by NSCs, as normalized to region-specific GAPDH (A-F; representative SN GAPDH shown). Complementary to NSC-induced BDNF expression in the striatum, expression its receptor TrkB was unaltered by genotype or treatment (G,H). Neither GDNF nor its activated receptor phospho-RET, commonly associated with changes in DA regulation, were affected by genotype or treatment (G,I,J). Representative images of TH demonstrate striatal downregulation due to h- $\alpha$ -syn (K), and confirm no loss of SNpc DA cells (L). Data are represented as mean  $\pm$  S.E.M. All Western blot graphs are represented as % of the ASOV group. Fisher's PLSD post hoc  $^{WTV,WTC} p < 0.0001$ .

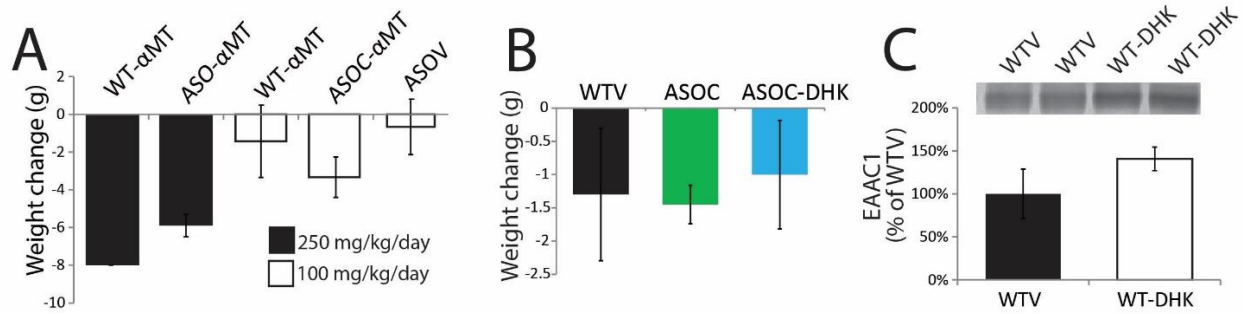

**SI Figure 4. Safety and dose-response experiments for pharmacological studies, Related to Figure 4.** Prior to experiments, dose response studies determined safe and optimal doses of the TH inhibitor  $\alpha$ -methyl-p-tyrosine ( $\alpha$ MT, 100 mg/kg in 0.9% NaCl) (**A**). In addition, the safe dose of GLT-1 inhibitor dihydrokainic acid (DHK, 10 mg/kg in 0.01 M PBS) was determined based on lack of weight change (**B**). The appropriate DHK dose resulted in a significant compensatory change in expression of the glutamate EAAC1 transporter (**C**).

## SI Methods

**Animals.** All procedures were performed in strict accordance with the University of California, Irvine animal use regulations and the NIH guide for the Care and Use of Laboratory Animals. ASO mice have been previously characterized, and are maintained on a purebred C57B6/J background by breeding heterozygous ASO mice with wild-type C57B6/J mice (Masliah, Rockenstein et al. 2000, Amschl, Neddens et al. 2013). All mice were housed on a 12 h light/dark schedule with *ad libitum* access to food and water.

**Neural Stem Cell and AAV Preparation, and Stereotactic Surgery.** Mouse NSCs: Hippocampal/cortical GFP-mNSCs were microdissected from GFP-transgenic syngeneic C57B6/J mice as previously described (Mizumoto, Mizumoto et al. 2003). GFP-mNSCs were isolated at age P1 in order to achieve a primarily gliogenic cell phenotype, promoting differentiation of these NSCs into support cells and not neuronal subtypes (i.e., DAergic, serotonergic). BDNF<sup>shRNA</sup> GFP-mNSCs were generated as previously described, using lentiviral delivery and stable selection of a shRNA construct targeting murine BDNF (Blurton-Jones, Kitazawa et al. 2009). Twelve month old ASO and WT mice were randomly assigned to a treatment group and either vehicle or 50,000 mNSCs/site (1µl volume, 2 sites per hemisphere) were transplanted bilaterally into the dorsal striatum (Bregma +0.03 AP, ± 2.0 ML, -3.0 and -3.5 DV). mNSCs remained on ice for the duration of the transplantation procedure and retained 89-94% viability. Mice were anesthetized with isoflurane, placed in the stereotax and injected with either 100,000 mNSCs per site (or vehicle (1x HBSS with 20 ng/mL hEGF) as a control treatment using a 5 µL Hamilton microsyringe (30-gauge) and an injection rate of 0.5 µL/min. Cells were delivered at two DV sites (1µl/site) per hemisphere to facilitate distribution of mNSCs throughout the dorsal and ventral medial striatum. The needle was retained within the



injection site for 4 minutes before slowly removing the needle to reduce potential backflow of cells along the needle tract. For AAV experiments, AAV2-mCherry or AAV-mCherry-BDNF were injected bilaterally at the same striatal coordinates (1µl of  $1.5 \times 10^{13}$  viral particles/ml; Vector Biolabs). Accurate injection to the targeted region was confirmed by visualization of the needle tract and GFP cells or mCherry within coronal brain sections.

**Pharmacological Studies.** Mice were administered intraperitoneal injections of the GLT-1 inhibitor dihydrokainic acid (DHK; 10 mg/kg/day; Tocris Bioscience, Briston, UK; (Gunduz, Oltulu et al. 2011, Gunduz, Oltulu et al. 2011)). Mice recovered for 2 days following stereotactic surgery; thereafter, DHK was administered once daily until the time of sacrifice. Intraperitoneal  $\alpha$ -methyl-p-tyrosine methyl ester hydrochloride ( $\alpha$ MT; 100 mg/kg/day; Sigma Aldrich, St. Louis, MO, USA; (Kelly, Rubinstein et al. 1998, Sotnikova, Beaulieu et al. 2005, Rung, Rung et al. 2011) was administered daily beginning 10 days prior to sacrifice (i.e., during behavioral training and assessment). Assessment of safety  $\alpha$ MT was conducted in our laboratory as described in SI Figure 3.

**Cognitive and Motor Behavioral Timeline & Assessment.** Thirty days following transplantation, behavioral assessments began lasting 10 days. On day 41, brains were harvested for histological and biochemical processing. All behavioral testing and analysis was performed blinded to treatment and genotype groups using an identification system decoded during statistical analysis. Cortical- and hippocampal-dependent memory tasks followed standard protocols for NOR and novel place recognition (NPR; (Bermudez-Rattoni, Okuda et al. 2005, Barker, Bird et al. 2007, Balderas, Rodriguez-Ortiz et al. 2008, McNulty, Barrett et al. 2012)). Briefly, mice were allowed to explore the object-free recognition chamber with only bedding for 5 minutes, 3 consecutive days. On the 4<sup>th</sup> day, mice were trained for 10 minutes in the presence

of 2 identical objects. Twenty-four hours later, one object was replaced with a novel one (NOR), or one object was moved to a novel location in the chamber (NPR) and animals were allowed to explore for 5 minutes. Object exploration was analyzed as degree of discrimination between novel and familiar objects [ $((\text{Time}_{\text{novel}} - \text{Time}_{\text{familiar}}) / (\text{Time}_{\text{novel}} + \text{Time}_{\text{familiar}})) * 100$ ]. Importantly, it was determined that mean distance traveled, mean ambulatory speed and time spent investigating objects during the training period were not altered by either genotype or treatment for any of the reported studies (**SI Figure 1**). Animals that lacked exploratory behavior (< 4 seconds total exploration) were excluded. Mice were next tested on pole descent, Rotarod and beam traversal tasks. For Rotarod, mice were trained for 5 consecutive trials at 12 rpm to stay on the fixed speed Rotarod for 2 min (Ugo Basile, Italy). Twenty-four hours later, mice are tested at 12 rpm for 2 min and latency to fall off of the rotating rod is measured. The pole test has been used previously to assess basal ganglia-related movement deficits in mice, finding that Parkinsonian mice display slower performance on this task than controls (Matsuura, Kabuto et al. 1997, Sedelis, Schwarting et al. 2001, Fernagut, Chalon et al. 2003, Fleming, Salcedo et al. 2004). Briefly, mice are placed head-up atop a vertical pinewood pole (50 cm high, 1 cm diameter), which is based in a cage of bedding and then the time required to rotate into a head down position and descend the pole is measured. Finally, mice were tested on the beam traversal challenge as modified from Fleming et al 2004. Mice were trained for 2 days to traverse a narrowing Plexiglas beam to reach their home cages. On day 3, a mesh grid was placed over the beam, and mice were videotaped traversing from base to apex. The number of total steps and foot-faults (forelimb slipping through the wire grid) was counted by a blinded observer from slow motion video.

**Biochemical Analyses.** Six weeks after transplantation, mice were sacrificed by Euthazol and transcardial perfusion with 0.01 M phosphate-buffered saline (PBS). The left side of the brain was flash frozen for subsequent biochemical analysis. The right hemisphere was post-fixed in 4% paraformaldehyde, and sectioned on a microtome (40  $\mu$ m, coronal) for immunohistochemical analyses. Half brain dorsal striatum, were microdissected. Each region was then processed to isolate mRNA and protein via Trizol (Life Technologies, Inc., Carlsbad CA) extraction. Both soluble and insoluble (Sarkosyl soluble) protein fractions were collected. Protein concentrations were determined via Bradford assay and normalized samples compared via SDS-PAGE Western blot. Relative signal intensity of grayscale images were then be quantified by Image J and once all values were obtained sample identification was decoded.

**Immunofluorescent Labeling.** Fluorescent immunohistochemistry followed previously described protocols (Blurton-Jones, Kitazawa et al. 2009). Briefly, coronal brain sections were rinsed 3 times in 0.01 M PBS, then placed into blocking solution (0.01 M PBS+0.02% Tx100+5% Goat serum) for 1 hr at room temperature. Primary antibodies were then diluted in fresh blocking solution and applied overnight at 4°C. Sections were then rinsed in PBS and incubated for 1 hr at room temperature in appropriate highly-cross absorbed Alexa Fluor secondary antibodies (Life Technology). Following 3 additional rinses, sections were mounted on slides and cover-slipped using Fluoromount G (Southern Biotech). The following primary antibodies were used: Dopaminergic antibodies: tyrosine hydroxylase (Millipore, #ab152), pTH ser31 (Cell Signaling, #3370), pTH ser19 (PhosphoSolutions, #p1580-19). Neurotrophin Antibodies: BDNF (Santa Cruz Biotech., # sc-546), TrkB (Cell Signaling, #4603), GDNF (Santa Cruz Biotech., #sc-328), phosphor-Erk1/2 (Cell Signaling, #9101). Glutamatergic Antibodies: GLT-1 (Abcam, #ab106289), VGLUT1 (Synaptic Systems, #135303), VGLUT2 (Synaptic

Systems, #135403), GLAST (Novus Biologicals, #NB100-1869), EAAC1 (Alpha Diagnostics, #EAAC11-A). Differentiation Antibodies: GFAP (Millipore, #MAB260), DCX (Abcam, #ab18723), Olig2 (Millipore, #MABN50).

**Confocal Microscopy and Quantification.** Sections were imaged in a blinded manner using an Olympus Fluoview FV1200 confocal microscope. For analysis of human  $\alpha$ -synuclein inclusions, sections were double-labeled for human and endogenous mouse  $\alpha$ -synuclein. Relative signal intensity of grayscale images were then be quantified by Image J and once all values were obtained sample coding was revealed.

**Statistical Analysis.** All animals were randomly assigned to treatment groups based only on wild-type or transgenic genotype and sex. Animal identification codes were randomly generated in order to keep the researcher blind to genotype and treatment throughout the behavioral testing, scoring, and statistical analysis. All statistical comparisons were performed using Statview 5 software. Comparisons between multiple groups utilized two-way analysis of variance (ANOVA) followed by Fisher's PLSD *post hoc* tests, with the exception of ASO-BKC studies which utilized one-way ANOVA due to the unmatched group design. Differences are considered significant when  $p < 0.05$  for both ANOVA and *post hoc* tests.

## REFERENCES

Amschl, D., J. Neddens, D. Havas, S. Flunkert, R. Rabl, H. Romer, E. Rockenstein, E. Masliah, M. Windisch and B. Hutter-Paier (2013). "Time course and progression of wild type alpha-synuclein accumulation in a transgenic mouse model." BMC Neurosci **14**: 6.

Balderas, I., C. J. Rodriguez-Ortiz, P. Salgado-Tonda, J. Chavez-Hurtado, J. L. McGaugh and F. Bermudez-Rattoni (2008). "The consolidation of object and context recognition memory involve different regions of the temporal lobe." Learn Mem **15**(9): 618-624.

Barker, G. R., F. Bird, V. Alexander and E. C. Warburton (2007). "Recognition memory for objects, place, and temporal order: a disconnection analysis of the role of the medial prefrontal cortex and perirhinal cortex." *J Neurosci* **27**(11): 2948-2957.

Bermudez-Rattoni, F., S. Okuda, B. Roozendaal and J. L. McGaugh (2005). "Insular cortex is involved in consolidation of object recognition memory." *Learn Mem* **12**(5): 447-449.

Blurton-Jones, M., M. Kitazawa, H. Martinez-Coria, N. A. Castello, F. J. Muller, J. F. Loring, T. R. Yamasaki, W. W. Poon, K. N. Green and F. M. LaFerla (2009). "Neural stem cells improve cognition via BDNF in a transgenic model of Alzheimer disease." *Proc Natl Acad Sci U S A* **106**(32): 13594-13599.

Fernagut, P. O., S. Chalon, E. Diguët, D. Guilloteau, F. Tison and M. Jaber (2003). "Motor behaviour deficits and their histopathological and functional correlates in the nigrostriatal system of dopamine transporter knockout mice." *Neuroscience* **116**(4): 1123-1130.

Fleming, S. M., J. Salcedo, P. O. Fernagut, E. Rockenstein, E. Masliah, M. S. Levine and M. F. Chesselet (2004). "Early and progressive sensorimotor anomalies in mice overexpressing wild-type human alpha-synuclein." *J Neurosci* **24**(42): 9434-9440.

Gunduz, O., C. Oltulu, D. Buldum, R. Guven and A. Ulugol (2011). "Anti-allodynic and anti-hyperalgesic effects of ceftriaxone in streptozocin-induced diabetic rats." *Neurosci Lett* **491**(1): 23-25.

Gunduz, O., C. Oltulu and A. Ulugol (2011). "Role of GLT-1 transporter activation in prevention of cannabinoid tolerance by the beta-lactam antibiotic, ceftriaxone, in mice." *Pharmacol Biochem Behav* **99**(1): 100-103.

Kelly, M. A., M. Rubinstein, T. J. Phillips, C. N. Lessov, S. Burkhart-Kasch, G. Zhang, J. R. Bunzow, Y. Fang, G. A. Gerhardt, D. K. Grandy and M. J. Low (1998). "Locomotor activity in D2 dopamine receptor-deficient mice is determined by gene dosage, genetic background, and developmental adaptations." *J Neurosci* **18**(9): 3470-3479.

Masliah, E., E. Rockenstein, I. Veinbergs, M. Mallory, M. Hashimoto, A. Takeda, Y. Sagara, A. Sisk and L. Mucke (2000). "Dopaminergic loss and inclusion body formation in alpha-synuclein mice: implications for neurodegenerative disorders." *Science* **287**(5456): 1265-1269.

Matsuura, K., H. Kabuto, H. Makino and N. Ogawa (1997). "Pole test is a useful method for evaluating the mouse movement disorder caused by striatal dopamine depletion." *J Neurosci Methods* **73**(1): 45-48.

McNulty, S. E., R. M. Barrett, A. Vogel-Ciernia, M. Malvaez, N. Hernandez, M. F. Davatolhagh, D. P. Matheos, A. Schiffman and M. A. Wood (2012). "Differential roles for Nr4a1 and Nr4a2 in object location vs. object recognition long-term memory." *Learn Mem* **19**(12): 588-592.

Mizumoto, H., K. Mizumoto, M. A. Shatos, H. Klassen and M. J. Young (2003). "Retinal transplantation of neural progenitor cells derived from the brain of GFP transgenic mice." *Vision Res* **43**(16): 1699-1708.

Rung, J. P., E. Rung, A. M. Johansson, K. Svensson, A. Carlsson and M. L. Carlsson (2011). "Effects of the dopamine stabilizers (S)-(-)-OSU6162 and ACR16 on prolactin secretion in drug-naive and monoamine-depleted rats." *Naunyn Schmiedeberg's Arch Pharmacol* **384**(1): 39-45.

Sedelis, M., R. K. Schwarting and J. P. Huston (2001). "Behavioral phenotyping of the MPTP mouse model of Parkinson's disease." *Behav Brain Res* **125**(1-2): 109-125.

Sotnikova, T. D., J. M. Beaulieu, L. S. Barak, W. C. Wetsel, M. G. Caron and R. R. Gainetdinov (2005). "Dopamine-independent locomotor actions of amphetamines in a novel acute mouse model of Parkinson disease." *PLoS Biol* **3**(8): e271.
